# Supplementary material for: Analytical Modification of EDFM for Transient Flow in Tight Rocks
Source: Research Square preprint supplement (doi:10.21203/rs.3.rs-1971564/v1), 2022-11-08
Supplement: Supplementary file 1 [file ad491dcae24c77f64175d73d.xlsx]

## Sheet: _xltb_storage_
XL Toolbox Settings
	export_preset	<?xml version="1.0" encoding="utf-16"?>_x000D_ <Preset xmlns:xsi="http://www.w3.org/2001/XMLSchema-instance" xmlns:xsd="http://www.w3.org/2001/XMLSchema">_x000D_ <Name>Png, 300 dpi, RGB, Transparent canvas</Name>_x000D_ <Dpi>300</Dpi>_x000D_ <FileType>Png</FileType>_x000D_ <ColorSpace>Rgb</ColorSpace>_x000D_ <Transparency>TransparentCanvas</Transparency>_x000D_ <UseColorProfile>false</UseColorPro…
	export_path	C:\Users\hrashi1\Videos\research\EDFMmodifications\EDFMmod\GasRtaeTransientModified10microD.png

## Sheet: HnPv2
Cume Oil					Cume Gas						Oil Rate				BHP		DP/q																qG	WellStatus	tEDFM
Time	EDFM	tEDFM			Time	EDFM	tEDFM			sqrt(t)	Time	EDFM	tEDFM	Percentage	EDFM	tEDFM	EDFM	tEDFM														EDFM	tEDFM	EDFM	WellStatus
0.00274658	0	0	0		0.00274658	0	0	0		0.0524078	0.00274658	194.63	217.376	0.104641	3000	3000	19.0104	17.0212														143081	159803	-1	-1
0.00549316	0.497575	0.574981	0.134624		0.00549316	365.789	422.694	0.134624		0.0741159	0.00549316	167.693	201.312	0.167	3000	3000	22.0642	18.3794														123278	147993	-1	-1
0.0109863	1.34116	1.64316	0.183795		0.0109863	985.944	1207.96	0.183795		0.104816	0.0109863	139.447	187.602	0.256687	3000	3000	26.5334	19.7227														102513	137914	-1	-1
0.0219727	2.69747	3.61986	0.254814		0.0219727	1983.03	2661.12	0.254814		0.148232	0.0219727	107.462	172.245	0.376111	3000	3000	34.4308	21.481														79000	126625	-1	-1
0.0439453	4.70519	7.20866	0.347287		0.0439453	3458.99	5299.4	0.347287		0.209631	0.0439453	75.285	154.415	0.512451	3000	3000	49.1466	23.9614														55345.3	113517	-1	-1
0.0878906	7.40814	13.5484	0.45321		0.0878906	5446.05	9960.04	0.45321		0.296464	0.0878906	47.7295	134.115	0.644115	3000	3000	77.5202	27.5883														35088	98593.6	-1	-1
0.175781	10.7561	24.3713	0.558658		0.175781	7907.27	17916.4	0.558658		0.419263	0.175781	28.4547	112.166	0.746316	3000	3000	130.031	32.9868														20918.3	82458.1	-1	-1
0.351562	14.8611	42.1529	0.647449		0.351562	10925	30988.4	0.647449		0.592927	0.351562	18.2508	90.1491	0.797548	3000	3000	202.731	41.0431														13417	66272.5	-1	-1
0.703125	20.6154	70.2821	0.706677		0.703125	15155.3	51667.4	0.706677		0.838525	0.703125	14.4848	69.8748	0.792704	3000	3000	255.44	52.9518														10648.4	51368	-1	-1
1.40625	30.4536	113.086	0.730704		1.40625	22387.8	83134.4	0.730704		1.18585	1.40625	13.4996	51.8784	0.739783	3000	3000	274.081	71.3206														9924.18	38138.1	-1	-1
2.8125	49.1883	176.735	0.721684		2.8125	36160.4	129926	0.721684		1.67705	2.8125	13.1451	38.6451	0.65985	3000	3000	281.473	95.743														9663.57	28409.7	-1	-1
5.625	85.556	270.914	0.684195		5.625	62895.9	199161	0.684195		2.37171	5.625	12.7163	28.3262	0.551076	3000	3000	290.964	130.621														9348.33	20823.9	-1	-1
11.25	155.057	408.347	0.620282		11.25	113989	300194	0.620282		3.3541	11.25	11.9952	20.5391	0.415983	3000	3000	308.458	180.145														8818.16	15099.2	-1	-1
22.5	283.603	606.752	0.532589		22.5	208489	446050	0.532589		4.74342	22.5	10.8574	14.7329	0.263049	3000	3000	340.781	251.139														7981.76	10830.8	-1	-1
45	510.035	889.941	0.426889		45	374949	654235	0.426889		6.7082	45	9.26991	10.4395	0.112037	3000	3000	399.141	354.423														6814.71	7674.54	-1	-1
90	884.126	1280.56	0.309579		90	649960	941396	0.309579		9.48683	90	7.35638	6.92137	0.0628508	3000	3000	502.965	534.576														5408	5088.2	-1	-1
180	1458.47	1814.64	0.196273		180	1.07219e+06	1.33402e+06	0.196273		13.4164	180	5.40686	4.94697	0.0929623	3000	3000	684.316	747.932														3974.82	3636.74	-1	-1
270	1894.85	2215.25	0.144634		270	1.39298e+06	1.62853e+06	0.144634		16.4317	270	4.29036	3.95549	0.0846605	3000	3000	862.397	935.409														3154.03	2907.85	-1	-1
360	2249.74	2542.67	0.115207		360	1.65388e+06	1.86923e+06	0.115207		18.9737	360	3.59605	3.32054	0.082971	3000	3000	1028.91	1114.27														2643.62	2441.08	-1	-1
450	2552.63	2824.7	0.0963181		450	1.87655e+06	2.07656e+06	0.0963181		21.2132	450	3.13501	2.9469	0.0638336	3000	3000	1180.22	1255.56														2304.68	2166.39	-1	-1
540	2820.25	3077.93	0.0837187		540	2.07329e+06	2.26272e+06	0.0837187		23.2379	540	2.81211	2.68045	0.0491168	3000	3000	1315.74	1380.36														2067.3	1970.52	-1	-1
630	3062.71	3310.21	0.0747709		630	2.25153e+06	2.43348e+06	0.0747709		25.0998	630	2.57571	2.4813	0.0380493	3000	3000	1436.5	1491.16														1893.51	1824.11	-1	-1
720	3286.43	3526.57	0.0680944		720	2.416e+06	2.59254e+06	0.0680944		26.8328	720	2.39595	2.32663	0.0297955	3000	3000	1544.27	1590.28														1761.37	1710.41	-1	-1
810	3495.71	3730.38	0.062909		810	2.56985e+06	2.74237e+06	0.062909		28.4605	810	2.25466	2.20253	0.0236654	3000	3000	1641.05	1679.88														1657.5	1619.18	-1	-1
900	3693.48	3924	0.0587465		900	2.71524e+06	2.8847e+06	0.0587465		30	900	2.14028	2.10011	0.0191263	3000	3000	1728.75	1761.81														1573.41	1543.88	-1	-1
990	3881.83	4109.11	0.0553123		990	2.8537e+06	3.02079e+06	0.0553123		31.4643	990	2.04523	2.01346	0.0157756	3000	3000	1809.09	1837.63														1503.54	1480.19	-1	-1
1080	4062.26	4286.95	0.0524134		1080	2.98635e+06	3.15153e+06	0.0524134		32.8634	1080	1.9644	1.9386	0.0133115	3000	3000	1883.52	1908.6														1444.12	1425.15	-1	-1
1095.73	4093.05	4317.34	0.0519523		1095.73	3.00898e+06	3.17387e+06	0.0519523		33.1018	1095.73	1.95068	1.92588	0.0128809	3000	3000	1896.77	1921.2														1434.03	1415.8	-1	-1
1095.73	4093.05	4317.34	0		1095.73	3.00898e+06	3.17387e+06	0		33.1018	1095.73	0	0	0	3019.32	3018.96	#DIV/0!	#DIV/0!														0	0	0	0
1095.73	4093.05	4317.34	0		1095.73	3.00898e+06	3.17387e+06	0		33.1018	1095.73	0	0	0	3028.33	3027.85	#DIV/0!	#DIV/0!														0	0	0	0
1095.73	4093.05	4317.34	0		1095.73	3.00898e+06	3.17387e+06	0		33.1019	1095.73	0	0	0	3230.34	3229.83	#DIV/0!	#DIV/0!														0	0	1	1
1095.74	4093.05	4317.34	0		1095.74	3.00898e+06	3.17387e+06	0		33.1019	1095.74	0	0	0	3256.59	3256	#DIV/0!	#DIV/0!														0	0	1	1
1095.74	4093.05	4317.34	0		1095.74	3.00898e+06	3.17387e+06	0		33.102	1095.74	0	0	0	3323.98	3323.13	#DIV/0!	#DIV/0!														0	0	1	1
1095.75	4093.05	4317.34	0		1095.75	3.00898e+06	3.17387e+06	0		33.1021	1095.75	0	0	0	3419.12	3417.66	#DIV/0!	#DIV/0!														0	0	1	1
1095.77	4093.05	4317.34	0		1095.77	3.00898e+06	3.17387e+06	0		33.1024	1095.77	0	0	0	3570.27	3567.57	#DIV/0!	#DIV/0!														0	0	1	1
1095.81	4093.05	4317.34	0		1095.81	3.00898e+06	3.17387e+06	0		33.103	1095.81	0	0	0	3851.57	3846.57	#DIV/0!	#DIV/0!														0	0	1	1
1095.89	4093.05	4317.34	0		1095.89	3.00898e+06	3.17387e+06	0		33.1042	1095.89	0	0	0	4270.84	4261.88	#DIV/0!	#DIV/0!														0	0	1	1
1096.04	4093.05	4317.34	0		1096.04	3.00898e+06	3.17387e+06	0		33.1066	1096.04	0	0	0	4778.7	4763.59	#DIV/0!	#DIV/0!														0	0	1	1
1096.36	4093.05	4317.34	0		1096.36	3.00898e+06	3.17387e+06	0		33.1113	1096.36	0	0	0	5083.21	5061.53	#DIV/0!	#DIV/0!														0	0	1	1
1096.98	4093.05	4317.34	0		1096.98	3.00898e+06	3.17387e+06	0		33.1207	1096.98	0	0	0	4938.8	4913.09	#DIV/0!	#DIV/0!														0	0	1	1
1098.23	4093.05	4317.34	0		1098.23	3.00898e+06	3.17387e+06	0		33.1396	1098.23	0	0	0	4620.23	4591.55	#DIV/0!	#DIV/0!														0	0	1	1
1100.73	4093.05	4317.34	0		1100.73	3.00898e+06	3.17387e+06	0		33.1773	1100.73	0	0	0	4450.48	4418.16	#DIV/0!	#DIV/0!														0	0	1	1
1105.73	4093.05	4317.34	0		1105.73	3.00898e+06	3.17387e+06	0		33.2526	1105.73	0	0	0	4507.78	4470.55	#DIV/0!	#DIV/0!														0	0	1	1
1115.73	4093.05	4317.34	0		1115.73	3.00898e+06	3.17387e+06	0		33.4026	1115.73	0	0	0	4857.34	4816.77	#DIV/0!	#DIV/0!														0	0	1	1
1125.73	4093.05	4317.34	0		1125.73	3.00898e+06	3.17387e+06	0		33.5519	1125.73	0	0	0	5249.4	5206.16	#DIV/0!	#DIV/0!														0	0	1	1
1135.73	4093.05	4317.34	0		1135.73	3.00898e+06	3.17387e+06	0		33.7006	1135.73	0	0	0	5643.57	5597.81	#DIV/0!	#DIV/0!														0	0	1	1
1145.73	4093.05	4317.34	0		1145.73	3.00898e+06	3.17387e+06	0		33.8487	1145.73	0	0	0	6032.45	5984.37	#DIV/0!	#DIV/0!														0	0	1	1
1155.73	4093.05	4317.34	0		1155.73	3.00898e+06	3.17387e+06	0		33.9961	1155.73	0	0	0	6407.54	6356.69	#DIV/0!	#DIV/0!														0	0	1	1
1155.83	4093.05	4317.34	0		1155.83	3.00898e+06	3.17387e+06	0		33.9974	1155.83	0	0	0	6270.2	6219.92	#DIV/0!	#DIV/0!														0	0	0	0
1155.92	4093.05	4317.34	0		1155.92	3.00898e+06	3.17387e+06	0		33.9988	1155.92	0	0	0	6210.64	6160.6	#DIV/0!	#DIV/0!														0	0	0	0
1156.11	4093.05	4317.34	0		1156.11	3.00898e+06	3.17387e+06	0		34.0016	1156.11	0	0	0	6109.74	6059.71	#DIV/0!	#DIV/0!														0	0	0	0
1156.48	4093.05	4317.34	0		1156.48	3.00898e+06	3.17387e+06	0		34.0071	1156.48	0	0	0	6043.33	5993.65	#DIV/0!	#DIV/0!														0	0	0	0
1157.23	4093.05	4317.34	0		1157.23	3.00898e+06	3.17387e+06	0		34.0181	1157.23	0	0	0	5969.94	5921.6	#DIV/0!	#DIV/0!														0	0	0	0
1158.73	4093.05	4317.34	0		1158.73	3.00898e+06	3.17387e+06	0		34.0402	1158.73	0	0	0	5886.96	5834.99	#DIV/0!	#DIV/0!														0	0	0	0
1161.73	4093.05	4317.34	0		1161.73	3.00898e+06	3.17387e+06	0		34.0842	1161.73	0	0	0	5811.6	5770.5	#DIV/0!	#DIV/0!														0	0	0	0
1164.73	4093.05	4317.34	0		1164.73	3.00898e+06	3.17387e+06	0		34.1282	1164.73	0	0	0	5773.26	5755.71	#DIV/0!	#DIV/0!														0	0	0	0
1167.73	4093.05	4317.34	0		1167.73	3.00898e+06	3.17387e+06	0		34.1721	1167.73	0	0	0	5749.76	5715.33	#DIV/0!	#DIV/0!														0	0	0	0
1169.73	4093.05	4317.34	0		1169.73	3.00898e+06	3.17387e+06	0		34.2014	1169.73	0	0	0	5772.34	5730.72	#DIV/0!	#DIV/0!														0	0	0	0
1170.98	4093.12	4318.68	0.0522284		1170.98	3.02137e+06	3.26497e+06	0.0746104		34.2196	1170.98	0.10703	2.12572	0.94965	3000	3000	34569.6	1740.59														19820.4	145758	-1	-1
1172.23	4093.34	4323.2	0.0531697		1172.23	3.0453e+06	3.37618e+06	0.0980023		34.2379	1172.23	0.244085	5.11463	0.952277	3000	3000	15158.7	723.414														18475.9	32174.2	-1	-1
1174.73	4095.9	4346.54	0.0576635		1174.73	3.08898e+06	3.4405e+06	0.102173		34.2744	1174.73	1.80632	13.5541	0.866733	3000	3000	2048.36	272.979														16464.1	19288.4	-1	-1
1179.73	4119.04	4413.84	0.066791		1179.73	3.15741e+06	3.52698e+06	0.104785		34.3472	1179.73	7.44803	13.3677	0.442834	3000	3000	496.776	276.787														10907.3	15302.6	-1	-1
1189.73	4195.55	4534.4	0.0747281		1189.73	3.25822e+06	3.65988e+06	0.109746		34.4925	1189.73	7.85556	10.7443	0.268863	3000	3000	471.004	344.368														9255.33	11275.9	-1	-1
1209.73	4346.88	4724.04	0.0798386		1209.73	3.42157e+06	3.84829e+06	0.110887		34.7812	1209.73	7.27732	8.21997	0.114678	3000	3000	508.429	450.123														7079.55	7565.97	-1	-1
1249.73	4608.9	5003.65	0.0788924		1249.73	3.66697e+06	4.10096e+06	0.105827		35.3516	1249.73	5.82369	5.76049	0.010971	3000	3000	635.336	642.306														5190.47	5067.44	-1	-1
1289.73	4817.56	5207.33	0.0748505		1289.73	3.85127e+06	4.27939e+06	0.100041		35.9128	1289.73	4.60919	4.42343	0.0419932	3000	3000	802.745	836.455														4024.72	3853.75	-1	-1
1329.73	4987.07	5368.33	0.0710205		1329.73	3.99891e+06	4.41935e+06	0.0951342		36.4655	1329.73	3.86639	3.62668	0.0660959	3000	3000	956.964	1020.22														3357.34	3144.2	-1	-1
1349.73	5061.36	5437.81	0.0692287		1349.73	4.06335e+06	4.47952e+06	0.0929049		36.7387	1349.73	3.56226	3.32107	0.072626	3000	3000	1038.67	1114.1														3085.99	2872.94	-1	-1
1349.73	5061.36	5437.81	0		1349.73	4.06335e+06	4.47952e+06	0		36.7387	1349.73	0	0	0	3037.64	3036.55	#DIV/0!	#DIV/0!														0	0	0	0
1349.74	5061.36	5437.81	0		1349.74	4.06335e+06	4.47952e+06	0		36.7388	1349.74	0	0	0	3051.29	3048.06	#DIV/0!	#DIV/0!														0	0	0	0
1349.74	5061.36	5437.81	0		1349.74	4.06335e+06	4.47952e+06	0		36.7388	1349.74	0	0	0	3232.38	3216.19	#DIV/0!	#DIV/0!														0	0	1	1
1349.74	5061.36	5437.81	0		1349.74	4.06335e+06	4.47952e+06	0		36.7388	1349.74	0	0	0	3290.83	3276.35	#DIV/0!	#DIV/0!														0	0	1	1
1349.75	5061.36	5437.81	0		1349.75	4.06335e+06	4.47952e+06	0		36.7389	1349.75	0	0	0	3346.18	3334.03	#DIV/0!	#DIV/0!														0	0	1	1
1349.76	5061.36	5437.81	0		1349.76	4.06335e+06	4.47952e+06	0		36.739	1349.76	0	0	0	3417.14	3406.07	#DIV/0!	#DIV/0!														0	0	1	1
1349.78	5061.36	5437.81	0		1349.78	4.06335e+06	4.47952e+06	0		36.7393	1349.78	0	0	0	3574.74	3562.12	#DIV/0!	#DIV/0!														0	0	1	1
1349.82	5061.36	5437.81	0		1349.82	4.06335e+06	4.47952e+06	0		36.7398	1349.82	0	0	0	3845.02	3829.06	#DIV/0!	#DIV/0!														0	0	1	1
1349.89	5061.36	5437.81	0		1349.89	4.06335e+06	4.47952e+06	0		36.7409	1349.89	0	0	0	4268.71	4237.69	#DIV/0!	#DIV/0!														0	0	1	1
1350.05	5061.36	5437.81	0		1350.05	4.06335e+06	4.47952e+06	0		36.743	1350.05	0	0	0	4808.82	4751.29	#DIV/0!	#DIV/0!														0	0	1	1
1350.36	5061.36	5437.81	0		1350.36	4.06335e+06	4.47952e+06	0		36.7473	1350.36	0	0	0	5196.43	5106.58	#DIV/0!	#DIV/0!														0	0	1	1
1350.99	5061.36	5437.81	0		1350.99	4.06335e+06	4.47952e+06	0		36.7558	1350.99	0	0	0	5148.21	5037.29	#DIV/0!	#DIV/0!														0	0	1	1
1352.24	5061.36	5437.81	0		1352.24	4.06335e+06	4.47952e+06	0		36.7728	1352.24	0	0	0	4886.18	4766.5	#DIV/0!	#DIV/0!														0	0	1	1
1354.74	5061.36	5437.81	0		1354.74	4.06335e+06	4.47952e+06	0		36.8068	1354.74	0	0	0	4738.57	4613.83	#DIV/0!	#DIV/0!														0	0	1	1
1359.74	5061.36	5437.81	0		1359.74	4.06335e+06	4.47952e+06	0		36.8746	1359.74	0	0	0	4797.84	4668.83	#DIV/0!	#DIV/0!														0	0	1	1
1369.74	5061.36	5437.81	0		1369.74	4.06335e+06	4.47952e+06	0		37.01	1369.74	0	0	0	5141.7	5005.43	#DIV/0!	#DIV/0!														0	0	1	1
1379.74	5061.36	5437.81	0		1379.74	4.06335e+06	4.47952e+06	0		37.1448	1379.74	0	0	0	5519.65	5378.83	#DIV/0!	#DIV/0!														0	0	1	1
1389.74	5061.36	5437.81	0		1389.74	4.06335e+06	4.47952e+06	0		37.2792	1389.74	0	0	0	5897.19	5752.35	#DIV/0!	#DIV/0!														0	0	1	1
1399.74	5061.36	5437.81	0		1399.74	4.06335e+06	4.47952e+06	0		37.4131	1399.74	0	0	0	6263.55	6114.8	#DIV/0!	#DIV/0!														0	0	1	1
1409.74	5061.36	5437.81	0		1409.74	4.06335e+06	4.47952e+06	0		37.5465	1409.74	0	0	0	6619.8	6466.89	#DIV/0!	#DIV/0!														0	0	1	1
1409.83	5061.36	5437.81	0		1409.83	4.06335e+06	4.47952e+06	0		37.5477	1409.83	0	0	0	6483.93	6342.38	#DIV/0!	#DIV/0!														0	0	0	0
1409.92	5061.36	5437.81	0		1409.92	4.06335e+06	4.47952e+06	0		37.549	1409.92	0	0	0	6427.47	6275.94	#DIV/0!	#DIV/0!														0	0	0	0
1410.11	5061.36	5437.81	0		1410.11	4.06335e+06	4.47952e+06	0		37.5515	1410.11	0	0	0	6329.03	6208.78	#DIV/0!	#DIV/0!														0	0	0	0
1410.49	5061.36	5437.81	0		1410.49	4.06335e+06	4.47952e+06	0		37.5565	1410.49	0	0	0	6265.95	6114.36	#DIV/0!	#DIV/0!														0	0	0	0
1411.24	5061.36	5437.81	0		1411.24	4.06335e+06	4.47952e+06	0		37.5664	1411.24	0	0	0	6197.24	6048.08	#DIV/0!	#DIV/0!														0	0	0	0
1412.74	5061.36	5437.81	0		1412.74	4.06335e+06	4.47952e+06	0		37.5864	1412.74	0	0	0	6121.88	5978.63	#DIV/0!	#DIV/0!														0	0	0	0
1415.74	5061.36	5437.81	0		1415.74	4.06335e+06	4.47952e+06	0		37.6263	1415.74	0	0	0	6056.27	5917.79	#DIV/0!	#DIV/0!														0	0	0	0
1418.74	5061.36	5437.81	0		1418.74	4.06335e+06	4.47952e+06	0		37.6661	1418.74	0	0	0	6021.42	5885.78	#DIV/0!	#DIV/0!														0	0	0	0
1421.74	5061.36	5437.81	0		1421.74	4.06335e+06	4.47952e+06	0		37.7059	1421.74	0	0	0	5999.7	5864.14	#DIV/0!	#DIV/0!														0	0	0	0
1423.74	5061.36	5437.81	0		1423.74	4.06335e+06	4.47952e+06	0		37.7324	1423.74	0	0	0	5987.81	5854.84	#DIV/0!	#DIV/0!														0	0	0	0
1424.99	5061.5	5439.79	0.0695414		1424.99	4.08918e+06	4.58576e+06	0.108286		37.749	1424.99	0.222234	3.16331	0.929746	3000	3000	16649.1	1169.66														41330.9	169981	-1	-1
1426.24	5061.85	5446.67	0.0706533		1426.24	4.12965e+06	4.7204e+06	0.125149		37.7656	1426.24	0.332555	7.84727	0.957622	3000	3000	11126	471.501														23413.5	45449.6	-1	-1
1428.74	5065.6	5477.31	0.0751649		1428.74	4.18341e+06	4.80766e+06	0.129844		37.7986	1428.74	2.67223	16.6579	0.839582	3000	3000	1384.61	222.117														19594.7	24352.8	-1	-1
1433.74	5092.87	5557.37	0.0835829		1433.74	4.26692e+06	4.91737e+06	0.132275		37.8647	1433.74	8.23354	15.3679	0.464237	3000	3000	449.381	240.762														13811.7	19533.6	-1	-1
1443.74	5179.2	5695.38	0.0906305		1443.74	4.39436e+06	5.08658e+06	0.136087		37.9965	1443.74	9.03279	12.2331	0.261613	3000	3000	409.619	302.457														11676.4	14308.3	-1	-1
1463.74	5353.74	5911.29	0.0943183		1463.74	4.60178e+06	5.32491e+06	0.135803		38.2588	1463.74	8.42159	9.35803	0.100069	3000	3000	439.347	395.382														9064.74	9525.04	-1	-1
1503.74	5656.61	6226.84	0.0915758		1503.74	4.91587e+06	5.64114e+06	0.128567		38.7781	1503.74	6.72183	6.41967	0.0470672	3000	3000	550.446	576.353														6639.94	6286.03	-1	-1
1543.74	5898.48	6452.61	0.0858772		1543.74	5.15344e+06	5.86151e+06	0.1208		39.2904	1543.74	5.37138	4.86872	0.103242	3000	3000	688.836	759.953														5238.76	4732.8	-1	-1
1583.74	6094.46	6628.77	0.080605		1583.74	5.34417e+06	6.03244e+06	0.114094		39.7962	1583.74	4.4279	3.93958	0.123951	3000	3000	835.611	939.185														4297.68	3813.45	-1	-1
1603.74	6179.14	6703.99	0.0782881		1603.74	5.42628e+06	6.10517e+06	0.111198		40.0467	1603.74	4.04028	3.58161	0.128065	3000	3000	915.777	1033.06														3913.33	3459.61	-1	-1
1603.74	6179.14	6703.99	0		1603.74	5.42628e+06	6.10517e+06	0		40.0467	1603.74	0	0	0	3039.94	3036.91	#DIV/0!	#DIV/0!														0	0	0	0
1603.74	6179.14	6703.99	0		1603.74	5.42628e+06	6.10517e+06	0		40.0467	1603.74	0	0	0	3055.74	3049.2	#DIV/0!	#DIV/0!														0	0	0	0
1603.74	6179.14	6703.99	0		1603.74	5.42628e+06	6.10517e+06	0		40.0468	1603.74	0	0	0	3258.9	3240.5	#DIV/0!	#DIV/0!														0	0	1	1
1603.75	6179.14	6703.99	0		1603.75	5.42628e+06	6.10517e+06	0		40.0468	1603.75	0	0	0	3285.34	3268.85	#DIV/0!	#DIV/0!														0	0	1	1
1603.75	6179.14	6703.99	0		1603.75	5.42628e+06	6.10517e+06	0		40.0469	1603.75	0	0	0	3334.8	3320.23	#DIV/0!	#DIV/0!														0	0	1	1
1603.76	6179.14	6703.99	0		1603.76	5.42628e+06	6.10517e+06	0		40.047	1603.76	0	0	0	3411.1	3396.35	#DIV/0!	#DIV/0!														0	0	1	1
1603.78	6179.14	6703.99	0		1603.78	5.42628e+06	6.10517e+06	0		40.0472	1603.78	0	0	0	3571.35	3554.43	#DIV/0!	#DIV/0!														0	0	1	1
1603.82	6179.14	6703.99	0		1603.82	5.42628e+06	6.10517e+06	0		40.0477	1603.82	0	0	0	3837.22	3814.49	#DIV/0!	#DIV/0!														0	0	1	1
1603.9	6179.14	6703.99	0		1603.9	5.42628e+06	6.10517e+06	0		40.0487	1603.9	0	0	0	4255.27	4212.59	#DIV/0!	#DIV/0!														0	0	1	1
1604.05	6179.14	6703.99	0		1604.05	5.42628e+06	6.10517e+06	0		40.0507	1604.05	0	0	0	4784.5	4706.82	#DIV/0!	#DIV/0!														0	0	1	1
1604.37	6179.14	6703.99	0		1604.37	5.42628e+06	6.10517e+06	0		40.0546	1604.37	0	0	0	5163.93	5042.93	#DIV/0!	#DIV/0!														0	0	1	1
1604.99	6179.14	6703.99	0		1604.99	5.42628e+06	6.10517e+06	0		40.0624	1604.99	0	0	0	5121.93	4972.26	#DIV/0!	#DIV/0!														0	0	1	1
1606.24	6179.14	6703.99	0		1606.24	5.42628e+06	6.10517e+06	0		40.078	1606.24	0	0	0	4872.91	4698.42	#DIV/0!	#DIV/0!														0	0	1	1
1608.74	6179.14	6703.99	0		1608.74	5.42628e+06	6.10517e+06	0		40.1091	1608.74	0	0	0	4732.62	4559.55	#DIV/0!	#DIV/0!														0	0	1	1
1613.74	6179.14	6703.99	0		1613.74	5.42628e+06	6.10517e+06	0		40.1714	1613.74	0	0	0	4790.31	4615.37	#DIV/0!	#DIV/0!														0	0	1	1
1623.74	6179.14	6703.99	0		1623.74	5.42628e+06	6.10517e+06	0		40.2957	1623.74	0	0	0	5117.53	4934.74	#DIV/0!	#DIV/0!														0	0	1	1
1633.74	6179.14	6703.99	0		1633.74	5.42628e+06	6.10517e+06	0		40.4196	1633.74	0	0	0	5476.51	5287.36	#DIV/0!	#DIV/0!														0	0	1	1
1643.74	6179.14	6703.99	0		1643.74	5.42628e+06	6.10517e+06	0		40.5431	1643.74	0	0	0	5833.74	5639.18	#DIV/0!	#DIV/0!														0	0	1	1
1653.74	6179.14	6703.99	0		1653.74	5.42628e+06	6.10517e+06	0		40.6662	1653.74	0	0	0	6179.59	5986.23	#DIV/0!	#DIV/0!														0	0	1	1
1663.74	6179.14	6703.99	0		1663.74	5.42628e+06	6.10517e+06	0		40.789	1663.74	0	0	0	6515.88	6317.95	#DIV/0!	#DIV/0!														0	0	1	1
1663.84	6179.14	6703.99	0		1663.84	5.42628e+06	6.10517e+06	0		40.7901	1663.84	0	0	0	6378.99	6195.1	#DIV/0!	#DIV/0!														0	0	0	0
1663.93	6179.14	6703.99	0		1663.93	5.42628e+06	6.10517e+06	0		40.7913	1663.93	0	0	0	6324.87	6128.68	#DIV/0!	#DIV/0!														0	0	0	0
1664.12	6179.14	6703.99	0		1664.12	5.42628e+06	6.10517e+06	0		40.7936	1664.12	0	0	0	6257.74	6062.47	#DIV/0!	#DIV/0!														0	0	0	0
1664.49	6179.14	6703.99	0		1664.49	5.42628e+06	6.10517e+06	0		40.7982	1664.49	0	0	0	6166.38	5969.88	#DIV/0!	#DIV/0!														0	0	0	0
1665.24	6179.14	6703.99	0		1665.24	5.42628e+06	6.10517e+06	0		40.8074	1665.24	0	0	0	6103.41	5909.19	#DIV/0!	#DIV/0!														0	0	0	0
1666.74	6179.14	6703.99	0		1666.74	5.42628e+06	6.10517e+06	0		40.8258	1666.74	0	0	0	6038.14	5847.89	#DIV/0!	#DIV/0!														0	0	0	0
1669.74	6179.14	6703.99	0		1669.74	5.42628e+06	6.10517e+06	0		40.8625	1669.74	0	0	0	5980.83	5795.51	#DIV/0!	#DIV/0!														0	0	0	0
1672.74	6179.14	6703.99	0		1672.74	5.42628e+06	6.10517e+06	0		40.8992	1672.74	0	0	0	5952.46	5768.13	#DIV/0!	#DIV/0!														0	0	0	0
1675.74	6179.14	6703.99	0		1675.74	5.42628e+06	6.10517e+06	0		40.9358	1675.74	0	0	0	5934.12	5751.9	#DIV/0!	#DIV/0!														0	0	0	0
1677.74	6179.14	6703.99	0		1677.74	5.42628e+06	6.10517e+06	0		40.9603	1677.74	0	0	0	5923.86	5740.95	#DIV/0!	#DIV/0!														0	0	0	0
1678.99	6179.61	6704.88	0.0783414		1678.99	5.51735e+06	6.14126e+06	0.101593		40.9755	1678.99	0.744733	1.42975	0.479118	3000	3000	4968.22	2587.86														145694	57736	-1	-1
1680.24	6180.35	6711.24	0.0791046		1680.24	5.62803e+06	6.20226e+06	0.0925833		40.9908	1680.24	0.432192	8.73906	0.950545	3000	3000	8561.02	423.386														31398.4	39860.6	-1	-1
1682.74	6184.75	6743.22	0.0828187		1682.74	5.6948e+06	6.28464e+06	0.0938543		41.0212	1682.74	3.09049	16.8431	0.816513	3000	3000	1197.22	219.674														22018.1	26048.1	-1	-1
1687.74	6214.77	6824.09	0.0892898		1687.74	5.78903e+06	6.40357e+06	0.0959677		41.0821	1687.74	8.9152	15.5055	0.425028	3000	3000	415.021	238.626														15674.8	21522.8	-1	-1
1697.74	6307.58	6964.57	0.0943333		1697.74	5.93442e+06	6.59145e+06	0.0996779		41.2037	1697.74	9.64658	12.5902	0.233801	3000	3000	383.556	293.88														13403.6	16052.7	-1	-1
1717.74	6493.74	7187.74	0.0965534		1717.74	6.17334e+06	6.86081e+06	0.100203		41.4457	1717.74	8.96941	9.72679	0.0778654	3000	3000	412.513	380.393														10488	10883.9	-1	-1
1757.74	6814.74	7509.69	0.0925401		1757.74	6.53714e+06	7.21661e+06	0.0941547		41.9254	1757.74	7.08078	6.37071	0.111457	3000	3000	522.542	580.783														7701.7	6906.18	-1	-1
1797.74	7068.25	7734.01	0.086083		1797.74	6.8123e+06	7.4594e+06	0.08675		42.3998	1797.74	5.59454	4.8456	0.154559	3000	3000	661.359	763.579														6056.31	5233.07	-1	-1
1837.74	7271.54	7909.27	0.0806305		1837.74	7.03201e+06	7.6483e+06	0.0805785		42.8689	1837.74	4.57013	3.91714	0.166701	3000	3000	809.606	944.568														4929.66	4212.19	-1	-1
1857.74	7358.73	7984	0.0783148		1857.74	7.12598e+06	7.72857e+06	0.0779695		43.1015	1857.74	4.14935	3.55604	0.166845	3000	3000	891.706	1040.48														4466.65	3814.51	-1	-1
1857.74	7358.73	7984	0		1857.74	7.12598e+06	7.72857e+06	0		43.1016	1857.74	0	0	0	3037.42	3032.85	#DIV/0!	#DIV/0!														0	0	0	0
1857.75	7358.73	7984	0		1857.75	7.12598e+06	7.72857e+06	0		43.1016	1857.75	0	0	0	3053.17	3045.28	#DIV/0!	#DIV/0!														0	0	0	0
1857.75	7358.73	7984	0		1857.75	7.12598e+06	7.72857e+06	0		43.1016	1857.75	0	0	0	3237.04	3221.29	#DIV/0!	#DIV/0!														0	0	1	1
1857.75	7358.73	7984	0		1857.75	7.12598e+06	7.72857e+06	0		43.1016	1857.75	0	0	0	3283.82	3268.46	#DIV/0!	#DIV/0!														0	0	1	1
1857.76	7358.73	7984	0		1857.76	7.12598e+06	7.72857e+06	0		43.1017	1857.76	0	0	0	3316.88	3300.75	#DIV/0!	#DIV/0!														0	0	1	1
1857.77	7358.73	7984	0		1857.77	7.12598e+06	7.72857e+06	0		43.1018	1857.77	0	0	0	3405.31	3385.58	#DIV/0!	#DIV/0!														0	0	1	1
1857.79	7358.73	7984	0		1857.79	7.12598e+06	7.72857e+06	0		43.102	1857.79	0	0	0	3556.32	3537.62	#DIV/0!	#DIV/0!														0	0	1	1
1857.83	7358.73	7984	0		1857.83	7.12598e+06	7.72857e+06	0		43.1025	1857.83	0	0	0	3814.43	3788.34	#DIV/0!	#DIV/0!														0	0	1	1
1857.9	7358.73	7984	0		1857.9	7.12598e+06	7.72857e+06	0		43.1034	1857.9	0	0	0	4213.45	4167.48	#DIV/0!	#DIV/0!														0	0	1	1
1858.06	7358.73	7984	0		1858.06	7.12598e+06	7.72857e+06	0		43.1052	1858.06	0	0	0	4714.63	4632.97	#DIV/0!	#DIV/0!														0	0	1	1
1858.37	7358.73	7984	0		1858.37	7.12598e+06	7.72857e+06	0		43.1088	1858.37	0	0	0	5064.3	4938.61	#DIV/0!	#DIV/0!														0	0	1	1
1859	7358.73	7984	0		1859	7.12598e+06	7.72857e+06	0		43.1161	1859	0	0	0	5016.08	4861.4	#DIV/0!	#DIV/0!														0	0	1	1
1860.25	7358.73	7984	0		1860.25	7.12598e+06	7.72857e+06	0		43.1306	1860.25	0	0	0	4777.15	4610.97	#DIV/0!	#DIV/0!														0	0	1	1
1862.75	7358.73	7984	0		1862.75	7.12598e+06	7.72857e+06	0		43.1596	1862.75	0	0	0	4643.9	4471.4	#DIV/0!	#DIV/0!														0	0	1	1
1867.75	7358.73	7984	0		1867.75	7.12598e+06	7.72857e+06	0		43.2174	1867.75	0	0	0	4697.68	4525.03	#DIV/0!	#DIV/0!														0	0	1	1
1877.75	7358.73	7984	0		1877.75	7.12598e+06	7.72857e+06	0		43.333	1877.75	0	0	0	5005.83	4818.8	#DIV/0!	#DIV/0!														0	0	1	1
1887.75	7358.73	7984	0		1887.75	7.12598e+06	7.72857e+06	0		43.4482	1887.75	0	0	0	5343	5147.81	#DIV/0!	#DIV/0!														0	0	1	1
1897.75	7358.73	7984	0		1897.75	7.12598e+06	7.72857e+06	0		43.5631	1897.75	0	0	0	5678.14	5476.17	#DIV/0!	#DIV/0!														0	0	1	1
1907.75	7358.73	7984	0		1907.75	7.12598e+06	7.72857e+06	0		43.6778	1907.75	0	0	0	6006.11	5793.82	#DIV/0!	#DIV/0!														0	0	1	1
1917.75	7358.73	7984	0		1917.75	7.12598e+06	7.72857e+06	0		43.7921	1917.75	0	0	0	6321.4	6102.83	#DIV/0!	#DIV/0!														0	0	1	1
1917.84	7358.73	7984	0		1917.84	7.12598e+06	7.72857e+06	0		43.7932	1917.84	0	0	0	6182.43	5981.71	#DIV/0!	#DIV/0!														0	0	0	0
1917.93	7358.73	7984	0		1917.93	7.12598e+06	7.72857e+06	0		43.7942	1917.93	0	0	0	6132.64	5915.59	#DIV/0!	#DIV/0!														0	0	0	0
1918.12	7358.73	7984	0		1918.12	7.12598e+06	7.72857e+06	0		43.7964	1918.12	0	0	0	6067.01	5849.5	#DIV/0!	#DIV/0!														0	0	0	0
1918.5	7358.73	7984	0		1918.5	7.12598e+06	7.72857e+06	0		43.8007	1918.5	0	0	0	5976.51	5757.87	#DIV/0!	#DIV/0!														0	0	0	0
1919.25	7358.73	7984	0		1919.25	7.12598e+06	7.72857e+06	0		43.8092	1919.25	0	0	0	5922.61	5701.02	#DIV/0!	#DIV/0!														0	0	0	0
1920.75	7358.73	7984	0		1920.75	7.12598e+06	7.72857e+06	0		43.8263	1920.75	0	0	0	5863.1	5648.13	#DIV/0!	#DIV/0!														0	0	0	0
1923.75	7358.73	7984	0		1923.75	7.12598e+06	7.72857e+06	0		43.8605	1923.75	0	0	0	5814.04	5603.55	#DIV/0!	#DIV/0!														0	0	0	0
1926.75	7358.73	7984	0		1926.75	7.12598e+06	7.72857e+06	0		43.8947	1926.75	0	0	0	5790.69	5583.58	#DIV/0!	#DIV/0!														0	0	0	0
1929.75	7358.73	7984	0		1929.75	7.12598e+06	7.72857e+06	0		43.9289	1929.75	0	0	0	5776.98	5566.98	#DIV/0!	#DIV/0!														0	0	0	0
1931.75	7358.73	7984	0		1931.75	7.12598e+06	7.72857e+06	0		43.9516	1931.75	0	0	0	5769.38	5558.33	#DIV/0!	#DIV/0!														0	0	0	0
1933	7359.2	7984.68	0.0783348		1933	7.21522e+06	7.76353e+06	0.0706262		43.9659	1933	0.73379	1.07441	0.317028	3000	3000	5042.31	3443.76														142779	55924.9	-1	-1
1934.25	7359.96	7989.24	0.0787661		1934.25	7.32548e+06	7.82511e+06	0.0638507		43.9801	1934.25	0.485822	6.23051	0.922025	3000	3000	7615.95	593.852														33630.3	42613.4	-1	-1
1936.75	7364.99	8016.04	0.0812183		1936.75	7.39745e+06	7.91289e+06	0.0651395		44.0085	1936.75	3.54123	15.2116	0.767202	3000	3000	1044.83	243.235														23947.7	27607	-1	-1
1941.75	7397.13	8091.57	0.0858218		1941.75	7.50099e+06	8.03908e+06	0.0669348		44.0653	1941.75	9.31469	14.9976	0.378923	3000	3000	397.222	246.705														17468.8	22870.6	-1	-1
1951.75	7493.99	8229.03	0.0893232		1951.75	7.66271e+06	8.24106e+06	0.0701794		44.1786	1951.75	10.0564	12.4955	0.195202	3000	3000	367.926	296.106														14875.4	17525.2	-1	-1
1971.75	7686.62	8451.81	0.0905347		1971.75	7.9286e+06	8.53749e+06	0.0713196		44.4044	1971.75	9.2071	9.78173	0.058746	3000	3000	401.864	378.256														11713.3	12117.3	-1	-1
2011.75	8014.64	8782.52	0.0874333		2011.75	8.33494e+06	8.94121e+06	0.0678061		44.8525	2011.75	7.19349	6.75401	0.0650699	3000	3000	514.354	547.823														8603.98	8068.94	-1	-1
2051.75	8271.45	9016.34	0.0826151		2051.75	8.64178e+06	9.2205e+06	0.0627646		45.2962	2051.75	5.64747	4.93703	0.1439	3000	3000	655.161	749.439														6737.75	5895.41	-1	-1
2091.75	8476.32	9193.94	0.0780535		2091.75	8.88645e+06	9.43364e+06	0.0580045		45.7356	2091.75	4.59568	3.94277	0.165597	3000	3000	805.105	938.427														5495.8	4761.78	-1	-1
2111.75	8564.05	9268.95	0.0760502		2111.75	8.99149e+06	9.52456e+06	0.0559685		45.9537	2111.75	4.17734	3.55892	0.173767	3000	3000	885.731	1039.64														5007.9	4330.13	-1	-1
2111.75	8564.05	9268.95	0		2111.75	8.99149e+06	9.52456e+06	0		45.9538	2111.75	0	0	0	3029.35	3026.57	#DIV/0!	#DIV/0!														0	0	0	0
2111.75	8564.05	9268.95	0		2111.75	8.99149e+06	9.52456e+06	0		45.9538	2111.75	0	0	0	3044.69	3028.73	#DIV/0!	#DIV/0!														0	0	0	0
2111.75	8564.05	9268.95	0		2111.75	8.99149e+06	9.52456e+06	0		45.9538	2111.75	0	0	0	3209.46	3191.2	#DIV/0!	#DIV/0!														0	0	1	1
2111.76	8564.05	9268.95	0		2111.76	8.99149e+06	9.52456e+06	0		45.9539	2111.76	0	0	0	3245.66	3226.96	#DIV/0!	#DIV/0!														0	0	1	1
2111.76	8564.05	9268.95	0		2111.76	8.99149e+06	9.52456e+06	0		45.9539	2111.76	0	0	0	3271.89	3249.99	#DIV/0!	#DIV/0!														0	0	1	1
2111.77	8564.05	9268.95	0		2111.77	8.99149e+06	9.52456e+06	0		45.954	2111.77	0	0	0	3333.77	3308.09	#DIV/0!	#DIV/0!														0	0	1	1
2111.79	8564.05	9268.95	0		2111.79	8.99149e+06	9.52456e+06	0		45.9542	2111.79	0	0	0	3458.75	3426.03	#DIV/0!	#DIV/0!														0	0	1	1
2111.83	8564.05	9268.95	0		2111.83	8.99149e+06	9.52456e+06	0		45.9547	2111.83	0	0	0	3685.53	3639.26	#DIV/0!	#DIV/0!														0	0	1	1
2111.91	8564.05	9268.95	0		2111.91	8.99149e+06	9.52456e+06	0		45.9555	2111.91	0	0	0	4051.96	3977.02	#DIV/0!	#DIV/0!														0	0	1	1
2112.06	8564.05	9268.95	0		2112.06	8.99149e+06	9.52456e+06	0		45.9572	2112.06	0	0	0	4520.08	4404.52	#DIV/0!	#DIV/0!														0	0	1	1
2112.38	8564.05	9268.95	0		2112.38	8.99149e+06	9.52456e+06	0		45.9606	2112.38	0	0	0	4860.01	4706.75	#DIV/0!	#DIV/0!														0	0	1	1
2113	8564.05	9268.95	0		2113	8.99149e+06	9.52456e+06	0		45.9674	2113	0	0	0	4837.4	4669.13	#DIV/0!	#DIV/0!														0	0	1	1
2114.25	8564.05	9268.95	0		2114.25	8.99149e+06	9.52456e+06	0		45.981	2114.25	0	0	0	4635.08	4464.17	#DIV/0!	#DIV/0!														0	0	1	1
2116.75	8564.05	9268.95	0		2116.75	8.99149e+06	9.52456e+06	0		46.0082	2116.75	0	0	0	4522.11	4345.85	#DIV/0!	#DIV/0!														0	0	1	1
2121.75	8564.05	9268.95	0		2121.75	8.99149e+06	9.52456e+06	0		46.0625	2121.75	0	0	0	4581.84	4393.89	#DIV/0!	#DIV/0!														0	0	1	1
2131.75	8564.05	9268.95	0		2131.75	8.99149e+06	9.52456e+06	0		46.1709	2131.75	0	0	0	4867.31	4672.73	#DIV/0!	#DIV/0!														0	0	1	1
2141.75	8564.05	9268.95	0		2141.75	8.99149e+06	9.52456e+06	0		46.2791	2141.75	0	0	0	5182	4980.88	#DIV/0!	#DIV/0!														0	0	1	1
2151.75	8564.05	9268.95	0		2151.75	8.99149e+06	9.52456e+06	0		46.387	2151.75	0	0	0	5495.27	5287.78	#DIV/0!	#DIV/0!														0	0	1	1
2161.75	8564.05	9268.95	0		2161.75	8.99149e+06	9.52456e+06	0		46.4946	2161.75	0	0	0	5797.62	5584.37	#DIV/0!	#DIV/0!														0	0	1	1
2171.75	8564.05	9268.95	0		2171.75	8.99149e+06	9.52456e+06	0		46.6021	2171.75	0	0	0	6091.87	5873.06	#DIV/0!	#DIV/0!														0	0	1	1
2171.85	8564.05	9268.95	0		2171.85	8.99149e+06	9.52456e+06	0		46.6031	2171.85	0	0	0	5927.87	5748.5	#DIV/0!	#DIV/0!														0	0	0	0
2171.94	8564.05	9268.95	0		2171.94	8.99149e+06	9.52456e+06	0		46.6041	2171.94	0	0	0	5905.43	5689.32	#DIV/0!	#DIV/0!														0	0	0	0
2172.13	8564.05	9268.95	0		2172.13	8.99149e+06	9.52456e+06	0		46.6061	2172.13	0	0	0	5841.13	5624.21	#DIV/0!	#DIV/0!														0	0	0	0
2172.5	8564.05	9268.95	0		2172.5	8.99149e+06	9.52456e+06	0		46.6101	2172.5	0	0	0	5751.15	5533.3	#DIV/0!	#DIV/0!														0	0	0	0
2173.25	8564.05	9268.95	0		2173.25	8.99149e+06	9.52456e+06	0		46.6182	2173.25	0	0	0	5697.25	5480.85	#DIV/0!	#DIV/0!														0	0	0	0
2174.75	8564.05	9268.95	0		2174.75	8.99149e+06	9.52456e+06	0		46.6342	2174.75	0	0	0	5649.13	5434.95	#DIV/0!	#DIV/0!														0	0	0	0
2177.75	8564.05	9268.95	0		2177.75	8.99149e+06	9.52456e+06	0		46.6664	2177.75	0	0	0	5608.52	5397.81	#DIV/0!	#DIV/0!														0	0	0	0
2180.75	8564.05	9268.95	0		2180.75	8.99149e+06	9.52456e+06	0		46.6985	2180.75	0	0	0	5589.97	5380.94	#DIV/0!	#DIV/0!														0	0	0	0
2183.75	8564.05	9268.95	0		2183.75	8.99149e+06	9.52456e+06	0		46.7306	2183.75	0	0	0	5577.57	5367.67	#DIV/0!	#DIV/0!														0	0	0	0
2185.75	8564.05	9268.95	0		2185.75	8.99149e+06	9.52456e+06	0		46.752	2185.75	0	0	0	5573.14	5360.53	#DIV/0!	#DIV/0!														0	0	0	0
2187	8564.5	9269.52	0.0760585		2187	9.07802e+06	9.56644e+06	0.0510555		46.7654	2187	0.711112	0.904065	0.213429	3000	3000	5203.12	4092.63														138443	66994.3	-1	-1
2188.25	8565.27	9272.47	0.076268		2188.25	9.18685e+06	9.63696e+06	0.0467065		46.7788	2188.25	0.531284	3.80579	0.860401	3000	3000	6964.26	972.203														35688.5	45841.2	-1	-1
2190.75	8572.54	9293.59	0.0775862		2190.75	9.26052e+06	9.73113e+06	0.0483615		46.8055	2190.75	5.27885	13.0939	0.596847	3000	3000	700.91	282.574														23242	29491.7	-1	-1
2195.75	8611.42	9361.92	0.080165		2195.75	9.36565e+06	9.86507e+06	0.0506245		46.8589	2195.75	10.2737	14.2359	0.278324	3000	3000	360.141	259.905														18813.4	24084.4	-1	-1
2205.75	8713.48	9494.06	0.0822176		2205.75	9.54266e+06	1.008e+07	0.0533122		46.9654	2205.75	10.1389	12.1928	0.168451	3000	3000	364.931	303.458														16586.9	18911	-1	-1
2225.75	8907.35	9712.9	0.0829357		2225.75	9.83979e+06	1.04046e+07	0.054285		47.1779	2225.75	9.24809	9.69094	0.0456976	3000	3000	400.083	381.8														13126.8	13545.1	-1	-1
2265.75	9236.58	10043.8	0.0803653		2265.75	1.03016e+07	1.0876e+07	0.0528147		47.5999	2265.75	7.21349	6.85179	0.0527887	3000	3000	512.928	540.005														9964.3	10026	-1	-1
2305.75	9495.78	10287.9	0.0769929		2305.75	1.06721e+07	1.12532e+07	0.0516359		48.0182	2305.75	5.74636	5.35429	0.0732262	3000	3000	643.886	691.035														8561.93	8832.99	-1	-1
2345.75	9706.57	10483.7	0.0741288		2345.75	1.10008e+07	1.15925e+07	0.0510381		48.433	2345.75	4.79335	4.43803	0.0800622	3000	3000	771.902	833.702														7871.34	8129.68	-1	-1
2365.75	9798.73	10568.9	0.0728698		2365.75	1.11556e+07	1.17518e+07	0.0507317		48.639	2365.75	4.42235	4.07836	0.0843443	3000	3000	836.659	907.226														7607.85	7802.61	-1	-1
2365.75	9798.73	10568.9	0		2365.75	1.11556e+07	1.17518e+07	0		48.639	2365.75	0	0	0	3027.23	3019.68	#DIV/0!	#DIV/0!														0	0	0	0
2365.76	9798.73	10568.9	0		2365.76	1.11556e+07	1.17518e+07	0		48.639	2365.76	0	0	0	3047.01	3035.75	#DIV/0!	#DIV/0!														0	0	0	0
2365.76	9798.73	10568.9	0		2365.76	1.11556e+07	1.17518e+07	0		48.6391	2365.76	0	0	0	3207.06	3175.97	#DIV/0!	#DIV/0!														0	0	1	1
2365.76	9798.73	10568.9	0		2365.76	1.11556e+07	1.17518e+07	0		48.6391	2365.76	0	0	0	3213.5	3186.01	#DIV/0!	#DIV/0!														0	0	1	1
2365.77	9798.73	10568.9	0		2365.77	1.11556e+07	1.17518e+07	0		48.6391	2365.77	0	0	0	3225.39	3200.12	#DIV/0!	#DIV/0!														0	0	1	1
2365.78	9798.73	10568.9	0		2365.78	1.11556e+07	1.17518e+07	0		48.6392	2365.78	0	0	0	3259.21	3234.12	#DIV/0!	#DIV/0!														0	0	1	1
2365.8	9798.73	10568.9	0		2365.8	1.11556e+07	1.17518e+07	0		48.6394	2365.8	0	0	0	3343.09	3313.69	#DIV/0!	#DIV/0!														0	0	1	1
2365.83	9798.73	10568.9	0		2365.83	1.11556e+07	1.17518e+07	0		48.6398	2365.83	0	0	0	3531.75	3487.12	#DIV/0!	#DIV/0!														0	0	1	1
2365.91	9798.73	10568.9	0		2365.91	1.11556e+07	1.17518e+07	0		48.6407	2365.91	0	0	0	3883.4	3811.7	#DIV/0!	#DIV/0!														0	0	1	1
2366.07	9798.73	10568.9	0		2366.07	1.11556e+07	1.17518e+07	0		48.6423	2366.07	0	0	0	4361.73	4254.36	#DIV/0!	#DIV/0!														0	0	1	1
2366.38	9798.73	10568.9	0		2366.38	1.11556e+07	1.17518e+07	0		48.6455	2366.38	0	0	0	4747.45	4610.51	#DIV/0!	#DIV/0!														0	0	1	1
2367.01	9798.73	10568.9	0		2367.01	1.11556e+07	1.17518e+07	0		48.6519	2367.01	0	0	0	4775.39	4636.08	#DIV/0!	#DIV/0!														0	0	1	1
2368.26	9798.73	10568.9	0		2368.26	1.11556e+07	1.17518e+07	0		48.6647	2368.26	0	0	0	4583.95	4455.17	#DIV/0!	#DIV/0!														0	0	1	1
2370.76	9798.73	10568.9	0		2370.76	1.11556e+07	1.17518e+07	0		48.6904	2370.76	0	0	0	4438.09	4311.86	#DIV/0!	#DIV/0!														0	0	1	1
2375.76	9798.73	10568.9	0		2375.76	1.11556e+07	1.17518e+07	0		48.7417	2375.76	0	0	0	4433.43	4295.13	#DIV/0!	#DIV/0!														0	0	1	1
2385.76	9798.73	10568.9	0		2385.76	1.11556e+07	1.17518e+07	0		48.8442	2385.76	0	0	0	4627.52	4452.32	#DIV/0!	#DIV/0!														0	0	1	1
2395.76	9798.73	10568.9	0		2395.76	1.11556e+07	1.17518e+07	0		48.9465	2395.76	0	0	0	4897.36	4676.24	#DIV/0!	#DIV/0!														0	0	1	1
2405.76	9798.73	10568.9	0		2405.76	1.11556e+07	1.17518e+07	0		49.0485	2405.76	0	0	0	5182.96	4933.07	#DIV/0!	#DIV/0!														0	0	1	1
2415.76	9798.73	10568.9	0		2415.76	1.11556e+07	1.17518e+07	0		49.1503	2415.76	0	0	0	5468.65	5206.03	#DIV/0!	#DIV/0!														0	0	1	1
2425.76	9798.73	10568.9	0		2425.76	1.11556e+07	1.17518e+07	0		49.252	2425.76	0	0	0	5747.11	5479.67	#DIV/0!	#DIV/0!														0	0	1	1
2425.85	9798.73	10568.9	0		2425.85	1.11556e+07	1.17518e+07	0		49.2529	2425.85	0	0	0	5630	5363.34	#DIV/0!	#DIV/0!														0	0	0	0
2425.94	9798.73	10568.9	0		2425.94	1.11556e+07	1.17518e+07	0		49.2539	2425.94	0	0	0	5564.49	5297.16	#DIV/0!	#DIV/0!														0	0	0	0
2426.13	9798.73	10568.9	0		2426.13	1.11556e+07	1.17518e+07	0		49.2558	2426.13	0	0	0	5502.63	5234.76	#DIV/0!	#DIV/0!														0	0	0	0
2426.51	9798.73	10568.9	0		2426.51	1.11556e+07	1.17518e+07	0		49.2596	2426.51	0	0	0	5444.7	5177.54	#DIV/0!	#DIV/0!														0	0	0	0
2427.26	9798.73	10568.9	0		2427.26	1.11556e+07	1.17518e+07	0		49.2672	2427.26	0	0	0	5363.07	5132.01	#DIV/0!	#DIV/0!														0	0	0	0
2428.76	9798.73	10568.9	0		2428.76	1.11556e+07	1.17518e+07	0		49.2824	2428.76	0	0	0	5322.36	5093.82	#DIV/0!	#DIV/0!														0	0	0	0
2431.76	9798.73	10568.9	0		2431.76	1.11556e+07	1.17518e+07	0		49.3128	2431.76	0	0	0	5293.84	5034.61	#DIV/0!	#DIV/0!														0	0	0	0
2434.76	9798.73	10568.9	0		2434.76	1.11556e+07	1.17518e+07	0		49.3433	2434.76	0	0	0	5278.91	5023.5	#DIV/0!	#DIV/0!														0	0	0	0
2437.76	9798.73	10568.9	0		2437.76	1.11556e+07	1.17518e+07	0		49.3736	2437.76	0	0	0	5270.24	5016.39	#DIV/0!	#DIV/0!														0	0	0	0
2439.76	9798.73	10568.9	0		2439.76	1.11556e+07	1.17518e+07	0		49.3939	2439.76	0	0	0	5265.3	5019.45	#DIV/0!	#DIV/0!														0	0	0	0
2441.01	9799.11	10569.5	0.0728884		2441.01	1.12359e+07	1.1834e+07	0.0505359		49.4065	2441.01	0.600584	0.98906	0.392773	3000	3000	6160.67	3740.92														128533	131498	-1	-1
2442.26	9799.8	10571.1	0.0729609		2442.26	1.13388e+07	1.19453e+07	0.0507711		49.4192	2442.26	0.504404	1.52451	0.669138	3000	3000	7335.39	2427														36099.9	46633.4	-1	-1
2444.76	9804.95	10584.1	0.0736162		2444.76	1.14181e+07	1.20417e+07	0.0517897		49.4445	2444.76	3.61162	8.90055	0.594225	3000	3000	1024.47	415.704														27275.5	30469.2	-1	-1
2449.76	9839.12	10636.8	0.0749963		2449.76	1.15366e+07	1.21785e+07	0.0527033		49.495	2449.76	10.0589	12.1952	0.175175	3000	3000	367.833	303.398														20147.3	24237.5	-1	-1
2459.76	9938.66	10753.7	0.0757953		2459.76	1.17282e+07	1.24042e+07	0.0545004		49.5959	2459.76	9.8485	11.1839	0.119407	3000	3000	375.692	330.831														18163.2	20910.7	-1	-1
2479.76	10127.2	10959.2	0.0759175		2479.76	1.20676e+07	1.27949e+07	0.056843		49.7972	2479.76	9.00877	9.3647	0.0380077	3000	3000	410.711	395.101														15783.1	18162.5	-1	-1
2519.76	10449.8	11284.1	0.073934		2519.76	1.26718e+07	1.34818e+07	0.060079		50.1972	2519.76	7.11922	6.87724	0.0351864	3000	3000	519.72	538.007														14427.5	16181.7	-1	-1
2559.76	10706.8	11528.2	0.0712583		2559.76	1.32323e+07	1.40947e+07	0.0611886		50.594	2559.76	5.72917	5.3315	0.0745885	3000	3000	645.817	693.988														13595.5	14464.5	-1	-1
2599.76	10916	11721	0.0686732		2599.76	1.37562e+07	1.464e+07	0.060368		50.9878	2599.76	4.73516	4.30451	0.100046	3000	3000	781.389	859.563														12598.8	12797.2	-1	-1
2619.76	11006.7	11803	0.0674665		2619.76	1.40026e+07	1.48878e+07	0.0594567		51.1836	2619.76	4.32636	3.89581	0.110518	3000	3000	855.221	949.739														12040.9	11981.7	-1	-1
2619.76	11006.7	11803	0		2619.76	1.40026e+07	1.48878e+07	0		51.1836	2619.76	0	0	0	3021.29	3012.03	#DIV/0!	#DIV/0!														0	0	0	0
2619.76	11006.7	11803	0		2619.76	1.40026e+07	1.48878e+07	0		51.1836	2619.76	0	0	0	3047.47	3036.18	#DIV/0!	#DIV/0!														0	0	0	0
2619.76	11006.7	11803	0		2619.76	1.40026e+07	1.48878e+07	0		51.1836	2619.76	0	0	0	3179.57	3152.2	#DIV/0!	#DIV/0!														0	0	1	1
2619.77	11006.7	11803	0		2619.77	1.40026e+07	1.48878e+07	0		51.1837	2619.77	0	0	0	3184.74	3161.91	#DIV/0!	#DIV/0!														0	0	1	1
2619.77	11006.7	11803	0		2619.77	1.40026e+07	1.48878e+07	0		51.1837	2619.77	0	0	0	3193.89	3173.94	#DIV/0!	#DIV/0!														0	0	1	1
2619.78	11006.7	11803	0		2619.78	1.40026e+07	1.48878e+07	0		51.1838	2619.78	0	0	0	3220.37	3201.29	#DIV/0!	#DIV/0!														0	0	1	1
2619.8	11006.7	11803	0		2619.8	1.40026e+07	1.48878e+07	0		51.184	2619.8	0	0	0	3281.78	3260.61	#DIV/0!	#DIV/0!														0	0	1	1
2619.84	11006.7	11803	0		2619.84	1.40026e+07	1.48878e+07	0		51.1844	2619.84	0	0	0	3411.05	3382.6	#DIV/0!	#DIV/0!														0	0	1	1
2619.92	11006.7	11803	0		2619.92	1.40026e+07	1.48878e+07	0		51.1851	2619.92	0	0	0	3688.47	3637.85	#DIV/0!	#DIV/0!														0	0	1	1
2620.07	11006.7	11803	0		2620.07	1.40026e+07	1.48878e+07	0		51.1867	2620.07	0	0	0	4144.55	4047.85	#DIV/0!	#DIV/0!														0	0	1	1
2620.39	11006.7	11803	0		2620.39	1.40026e+07	1.48878e+07	0		51.1897	2620.39	0	0	0	4562.18	4424.09	#DIV/0!	#DIV/0!														0	0	1	1
2621.01	11006.7	11803	0		2621.01	1.40026e+07	1.48878e+07	0		51.1958	2621.01	0	0	0	4659.16	4511.49	#DIV/0!	#DIV/0!														0	0	1	1
2622.26	11006.7	11803	0		2622.26	1.40026e+07	1.48878e+07	0		51.208	2622.26	0	0	0	4518.54	4382.16	#DIV/0!	#DIV/0!														0	0	1	1
2624.76	11006.7	11803	0		2624.76	1.40026e+07	1.48878e+07	0		51.2324	2624.76	0	0	0	4383.26	4255.21	#DIV/0!	#DIV/0!														0	0	1	1
2629.76	11006.7	11803	0		2629.76	1.40026e+07	1.48878e+07	0		51.2812	2629.76	0	0	0	4352.55	4222.67	#DIV/0!	#DIV/0!														0	0	1	1
2639.76	11006.7	11803	0		2639.76	1.40026e+07	1.48878e+07	0		51.3786	2639.76	0	0	0	4468.24	4323.13	#DIV/0!	#DIV/0!														0	0	1	1
2649.76	11006.7	11803	0		2649.76	1.40026e+07	1.48878e+07	0		51.4758	2649.76	0	0	0	4639.92	4476.85	#DIV/0!	#DIV/0!														0	0	1	1
2659.76	11006.7	11803	0		2659.76	1.40026e+07	1.48878e+07	0		51.5729	2659.76	0	0	0	4828.91	4646.56	#DIV/0!	#DIV/0!														0	0	1	1
2669.76	11006.7	11803	0		2669.76	1.40026e+07	1.48878e+07	0		51.6697	2669.76	0	0	0	5031.13	4826.36	#DIV/0!	#DIV/0!														0	0	1	1
2679.76	11006.7	11803	0		2679.76	1.40026e+07	1.48878e+07	0		51.7664	2679.76	0	0	0	5244.3	5016.11	#DIV/0!	#DIV/0!														0	0	1	1
2679.86	11006.7	11803	0		2679.86	1.40026e+07	1.48878e+07	0		51.7673	2679.86	0	0	0	5127.4	4899.91	#DIV/0!	#DIV/0!														0	0	0	0
2679.95	11006.7	11803	0		2679.95	1.40026e+07	1.48878e+07	0		51.7682	2679.95	0	0	0	5059.84	4832.35	#DIV/0!	#DIV/0!														0	0	0	0
2680.14	11006.7	11803	0		2680.14	1.40026e+07	1.48878e+07	0		51.77	2680.14	0	0	0	4990.45	4761.86	#DIV/0!	#DIV/0!														0	0	0	0
2680.51	11006.7	11803	0		2680.51	1.40026e+07	1.48878e+07	0		51.7737	2680.51	0	0	0	4928.47	4698.93	#DIV/0!	#DIV/0!														0	0	0	0
2681.26	11006.7	11803	0		2681.26	1.40026e+07	1.48878e+07	0		51.7809	2681.26	0	0	0	4882.71	4652.74	#DIV/0!	#DIV/0!														0	0	0	0
2682.76	11006.7	11803	0		2682.76	1.40026e+07	1.48878e+07	0		51.7954	2682.76	0	0	0	4853.04	4626.41	#DIV/0!	#DIV/0!														0	0	0	0
2685.76	11006.7	11803	0		2685.76	1.40026e+07	1.48878e+07	0		51.8243	2685.76	0	0	0	4811.79	4581.33	#DIV/0!	#DIV/0!														0	0	0	0
2688.76	11006.7	11803	0		2688.76	1.40026e+07	1.48878e+07	0		51.8533	2688.76	0	0	0	4805.21	4579.49	#DIV/0!	#DIV/0!														0	0	0	0
2691.76	11006.7	11803	0		2691.76	1.40026e+07	1.48878e+07	0		51.8822	2691.76	0	0	0	4803.82	4580.93	#DIV/0!	#DIV/0!														0	0	0	0
2693.76	11006.7	11803	0		2693.76	1.40026e+07	1.48878e+07	0		51.9015	2693.76	0	0	0	4804.53	4579.96	#DIV/0!	#DIV/0!														0	0	0	0
2695.01	11007	11803.3	0.0674689		2695.01	1.40722e+07	1.4958e+07	0.0592236		51.9135	2695.01	0.453215	0.535911	0.154308	3000	3000	8163.89	6904.13														111308	112414	-1	-1
2696.26	11007.5	11804.1	0.0674856		2696.26	1.41647e+07	1.50571e+07	0.0592709		51.9255	2696.26	0.391569	0.709598	0.448182	3000	3000	9449.17	5214.22														36712	46137.4	-1	-1
2698.76	11011.2	11811	0.0677197		2698.76	1.4249e+07	1.51611e+07	0.0601601		51.9496	2698.76	2.58995	4.85963	0.467048	3000	3000	1428.6	761.376														30778.8	37070.1	-1	-1
2703.76	11037.1	11846.6	0.0683339		2703.76	1.43887e+07	1.53305e+07	0.0614355		51.9977	2703.76	7.75722	9.36082	0.17131	3000	3000	476.975	395.264														25087.5	30693.8	-1	-1
2713.76	11119.4	11940.5	0.0687675		2713.76	1.46325e+07	1.56257e+07	0.0635637		52.0938	2713.76	8.71007	9.42584	0.0759369	3000	3000	424.796	392.538														23672	28343.6	-1	-1
2733.76	11287.6	12115.7	0.0683535		2733.76	1.50936e+07	1.61643e+07	0.0662402		52.2854	2733.76	8.10719	8.09465	0.00154866	3000	3000	456.385	457.092														22436.2	25514.4	-1	-1
2773.76	11577	12396.5	0.0661083		2773.76	1.59525e+07	1.71054e+07	0.0673993		52.6665	2773.76	6.36335	5.94383	0.0705808	3000	3000	581.455	622.494														20510.8	21540.8	-1	-1
2813.76	11805.2	12606.7	0.0635734		2813.76	1.67297e+07	1.79004e+07	0.065399		53.0449	2813.76	5.04877	4.5652	0.105926	3000	3000	732.852	810.48														18349.3	18208.1	-1	-1
2853.76	11988.3	12770.8	0.0612694		2853.76	1.74201e+07	1.85724e+07	0.0620412		53.4206	2853.76	4.10617	3.64017	0.128016	3000	3000	901.082	1016.44														16170.5	15390.9	-1	-1
2873.76	12066.6	12839.9	0.0602288		2873.76	1.77326e+07	1.88673e+07	0.0601388		53.6075	2873.76	3.71855	3.27196	0.136491	3000	3000	995.011	1130.82														15081.7	14101.7	-1	-1
2873.76	12066.6	12839.9	0		2873.76	1.77326e+07	1.88673e+07	0		53.6075	2873.76	0	0	0	3013.49	3005.02	#DIV/0!	#DIV/0!														0	0	0	0
2873.77	12066.6	12839.9	0		2873.77	1.77326e+07	1.88673e+07	0		53.6075	2873.77	0	0	0	3041.89	3031.84	#DIV/0!	#DIV/0!														0	0	0	0
2873.77	12066.6	12839.9	0		2873.77	1.77326e+07	1.88673e+07	0		53.6075	2873.77	0	0	0	3154.93	3133.33	#DIV/0!	#DIV/0!														0	0	1	1
2873.77	12066.6	12839.9	0		2873.77	1.77326e+07	1.88673e+07	0		53.6076	2873.77	0	0	0	3160.76	3142.99	#DIV/0!	#DIV/0!														0	0	1	1
2873.78	12066.6	12839.9	0		2873.78	1.77326e+07	1.88673e+07	0		53.6076	2873.78	0	0	0	3169.08	3153.62	#DIV/0!	#DIV/0!														0	0	1	1
2873.79	12066.6	12839.9	0		2873.79	1.77326e+07	1.88673e+07	0		53.6077	2873.79	0	0	0	3191.93	3176.92	#DIV/0!	#DIV/0!														0	0	1	1
2873.81	12066.6	12839.9	0		2873.81	1.77326e+07	1.88673e+07	0		53.6079	2873.81	0	0	0	3244.25	3227.45	#DIV/0!	#DIV/0!														0	0	1	1
2873.84	12066.6	12839.9	0		2873.84	1.77326e+07	1.88673e+07	0		53.6083	2873.84	0	0	0	3351.9	3330	#DIV/0!	#DIV/0!														0	0	1	1
2873.92	12066.6	12839.9	0		2873.92	1.77326e+07	1.88673e+07	0		53.609	2873.92	0	0	0	3565.21	3530.12	#DIV/0!	#DIV/0!														0	0	1	1
2874.08	12066.6	12839.9	0		2874.08	1.77326e+07	1.88673e+07	0		53.6104	2874.08	0	0	0	3942.24	3868.43	#DIV/0!	#DIV/0!														0	0	1	1
2874.39	12066.6	12839.9	0		2874.39	1.77326e+07	1.88673e+07	0		53.6134	2874.39	0	0	0	4337.05	4218.48	#DIV/0!	#DIV/0!														0	0	1	1
2875.02	12066.6	12839.9	0		2875.02	1.77326e+07	1.88673e+07	0		53.6192	2875.02	0	0	0	4472.36	4337.26	#DIV/0!	#DIV/0!														0	0	1	1
2876.27	12066.6	12839.9	0		2876.27	1.77326e+07	1.88673e+07	0		53.6308	2876.27	0	0	0	4380.63	4252.65	#DIV/0!	#DIV/0!														0	0	1	1
2878.77	12066.6	12839.9	0		2878.77	1.77326e+07	1.88673e+07	0		53.6541	2878.77	0	0	0	4271.38	4150.72	#DIV/0!	#DIV/0!														0	0	1	1
2883.77	12066.6	12839.9	0		2883.77	1.77326e+07	1.88673e+07	0		53.7007	2883.77	0	0	0	4239.05	4120.05	#DIV/0!	#DIV/0!														0	0	1	1
2893.77	12066.6	12839.9	0		2893.77	1.77326e+07	1.88673e+07	0		53.7937	2893.77	0	0	0	4320.22	4193.43	#DIV/0!	#DIV/0!														0	0	1	1
2903.77	12066.6	12839.9	0		2903.77	1.77326e+07	1.88673e+07	0		53.8866	2903.77	0	0	0	4453.28	4314.88	#DIV/0!	#DIV/0!														0	0	1	1
2913.77	12066.6	12839.9	0		2913.77	1.77326e+07	1.88673e+07	0		53.9793	2913.77	0	0	0	4601.84	4451.35	#DIV/0!	#DIV/0!														0	0	1	1
2923.77	12066.6	12839.9	0		2923.77	1.77326e+07	1.88673e+07	0		54.0719	2923.77	0	0	0	4757.85	4596.25	#DIV/0!	#DIV/0!														0	0	1	1
2933.77	12066.6	12839.9	0		2933.77	1.77326e+07	1.88673e+07	0		54.1643	2933.77	0	0	0	4918.73	4746.48	#DIV/0!	#DIV/0!														0	0	1	1
2933.86	12066.6	12839.9	0		2933.86	1.77326e+07	1.88673e+07	0		54.1651	2933.86	0	0	0	4805.03	4632.96	#DIV/0!	#DIV/0!														0	0	0	0
2933.95	12066.6	12839.9	0		2933.95	1.77326e+07	1.88673e+07	0		54.166	2933.95	0	0	0	4739.76	4566.77	#DIV/0!	#DIV/0!														0	0	0	0
2934.14	12066.6	12839.9	0		2934.14	1.77326e+07	1.88673e+07	0		54.1677	2934.14	0	0	0	4674.02	4498.54	#DIV/0!	#DIV/0!														0	0	0	0
2934.52	12066.6	12839.9	0		2934.52	1.77326e+07	1.88673e+07	0		54.1712	2934.52	0	0	0	4610.88	4439.31	#DIV/0!	#DIV/0!														0	0	0	0
2935.27	12066.6	12839.9	0		2935.27	1.77326e+07	1.88673e+07	0		54.1781	2935.27	0	0	0	4568.89	4395.04	#DIV/0!	#DIV/0!														0	0	0	0
2936.77	12066.6	12839.9	0		2936.77	1.77326e+07	1.88673e+07	0		54.1919	2936.77	0	0	0	4541.99	4373.5	#DIV/0!	#DIV/0!														0	0	0	0
2939.77	12066.6	12839.9	0		2939.77	1.77326e+07	1.88673e+07	0		54.2196	2939.77	0	0	0	4500.68	4330.17	#DIV/0!	#DIV/0!														0	0	0	0
2942.77	12066.6	12839.9	0		2942.77	1.77326e+07	1.88673e+07	0		54.2473	2942.77	0	0	0	4500.22	4329.57	#DIV/0!	#DIV/0!														0	0	0	0
2945.77	12066.6	12839.9	0		2945.77	1.77326e+07	1.88673e+07	0		54.2749	2945.77	0	0	0	4503.75	4330.68	#DIV/0!	#DIV/0!														0	0	0	0
2947.77	12066.6	12839.9	0		2947.77	1.77326e+07	1.88673e+07	0		54.2933	2947.77	0	0	0	4500.74	4331.36	#DIV/0!	#DIV/0!														0	0	0	0
2949.02	12066.8	12840.2	0.0602309		2949.02	1.7799e+07	1.89343e+07	0.0599572		54.3048	2949.02	0.318006	0.385215	0.174473	3000	3000	11635	9605.02														106167	107110	-1	-1
2950.27	12067.2	12840.7	0.0602403		2950.27	1.78921e+07	1.9033e+07	0.0599436		54.3164	2950.27	0.340799	0.522133	0.347296	3000	3000	10856.9	7086.31														42683	50790.7	-1	-1
2952.77	12069.7	12844.7	0.0603375		2952.77	1.79938e+07	1.91526e+07	0.0605038		54.3394	2952.77	1.64881	2.65801	0.379683	3000	3000	2244.04	1392.02														38714.4	44928.5	-1	-1
2957.77	12088.7	12869.9	0.0606976		2957.77	1.81737e+07	1.93579e+07	0.0611754		54.3854	2957.77	5.95801	7.40982	0.195931	3000	3000	621.013	499.337														33238.8	37193.3	-1	-1
2967.77	12154.3	12944.4	0.0610369		2967.77	1.84934e+07	1.9714e+07	0.0619164		54.4772	2967.77	7.15559	7.48622	0.0441654	3000	3000	517.078	494.241														30705.3	34029.7	-1	-1
2987.77	12292.3	13084.1	0.0605137		2987.77	1.90807e+07	2.03515e+07	0.0624435		54.6605	2987.77	6.648	6.48574	0.0250186	3000	3000	556.558	570.483														28020.6	29715.8	-1	-1
3027.77	12529.4	13310	0.0586481		3027.77	2.01202e+07	2.14228e+07	0.0608044		55.0251	3027.77	5.2049	4.80908	0.0823072	3000	3000	710.868	769.378														23956.7	23850.7	-1	-1
3067.77	12715.7	13480	0.0567051		3067.77	2.10068e+07	2.22879e+07	0.0574773		55.3874	3067.77	4.10978	3.69477	0.112323	3000	3000	900.292	1001.42														20373.9	19402.3	-1	-1
3107.77	12864.3	13612.8	0.0549828		3107.77	2.17597e+07	2.29945e+07	0.0537009		55.7473	3107.77	3.32405	2.94315	0.129419	3000	3000	1113.1	1257.15														17270.8	15931.4	-1	-1
3127.77	12927.6	13668.7	0.0542164		3127.77	2.20907e+07	2.32979e+07	0.0518151		55.9264	3127.77	3.00119	2.64162	0.136119	3000	3000	1232.84	1400.66														15828.4	14403.4	-1	-1
3127.77	12927.6	13668.7	0		3127.77	2.20907e+07	2.32979e+07	0		55.9265	3127.77	0	0	0	3005.25	2998.55	#DIV/0!	#DIV/0!														0	0	0	0
3127.77	12927.6	13668.7	0		3127.77	2.20907e+07	2.32979e+07	0		55.9265	3127.77	0	0	0	3035.21	3026.91	#DIV/0!	#DIV/0!														0	0	0	0
3127.77	12927.6	13668.7	0		3127.77	2.20907e+07	2.32979e+07	0		55.9265	3127.77	0	0	0	3136.29	3119.46	#DIV/0!	#DIV/0!														0	0	1	1
3127.78	12927.6	13668.7	0		3127.78	2.20907e+07	2.32979e+07	0		55.9265	3127.78	0	0	0	3142.62	3128.7	#DIV/0!	#DIV/0!														0	0	1	1
3127.78	12927.6	13668.7	0		3127.78	2.20907e+07	2.32979e+07	0		55.9266	3127.78	0	0	0	3150.39	3138.42	#DIV/0!	#DIV/0!														0	0	1	1
3127.79	12927.6	13668.7	0		3127.79	2.20907e+07	2.32979e+07	0		55.9267	3127.79	0	0	0	3170.74	3159.14	#DIV/0!	#DIV/0!														0	0	1	1
3127.81	12927.6	13668.7	0		3127.81	2.20907e+07	2.32979e+07	0		55.9268	3127.81	0	0	0	3217.17	3204.29	#DIV/0!	#DIV/0!														0	0	1	1
3127.85	12927.6	13668.7	0		3127.85	2.20907e+07	2.32979e+07	0		55.9272	3127.85	0	0	0	3311.63	3295.13	#DIV/0!	#DIV/0!														0	0	1	1
3127.93	12927.6	13668.7	0		3127.93	2.20907e+07	2.32979e+07	0		55.9279	3127.93	0	0	0	3494.65	3469.25	#DIV/0!	#DIV/0!														0	0	1	1
3128.08	12927.6	13668.7	0		3128.08	2.20907e+07	2.32979e+07	0		55.9293	3128.08	0	0	0	3803.21	3751.85	#DIV/0!	#DIV/0!														0	0	1	1
3128.4	12927.6	13668.7	0		3128.4	2.20907e+07	2.32979e+07	0		55.9321	3128.4	0	0	0	4143.84	4056.64	#DIV/0!	#DIV/0!														0	0	1	1
3129.02	12927.6	13668.7	0		3129.02	2.20907e+07	2.32979e+07	0		55.9377	3129.02	0	0	0	4287.93	4183.47	#DIV/0!	#DIV/0!														0	0	1	1
3130.27	12927.6	13668.7	0		3130.27	2.20907e+07	2.32979e+07	0		55.9488	3130.27	0	0	0	4229.42	4128.01	#DIV/0!	#DIV/0!														0	0	1	1
3132.77	12927.6	13668.7	0		3132.77	2.20907e+07	2.32979e+07	0		55.9712	3132.77	0	0	0	4141.26	4044.98	#DIV/0!	#DIV/0!														0	0	1	1
3137.77	12927.6	13668.7	0		3137.77	2.20907e+07	2.32979e+07	0		56.0158	3137.77	0	0	0	4115.06	4020	#DIV/0!	#DIV/0!														0	0	1	1
3147.77	12927.6	13668.7	0		3147.77	2.20907e+07	2.32979e+07	0		56.105	3147.77	0	0	0	4183.69	4088.11	#DIV/0!	#DIV/0!														0	0	1	1
3157.77	12927.6	13668.7	0		3157.77	2.20907e+07	2.32979e+07	0		56.1941	3157.77	0	0	0	4294.12	4191.02	#DIV/0!	#DIV/0!														0	0	1	1
3167.77	12927.6	13668.7	0		3167.77	2.20907e+07	2.32979e+07	0		56.283	3167.77	0	0	0	4417.11	4307.11	#DIV/0!	#DIV/0!														0	0	1	1
3177.77	12927.6	13668.7	0		3177.77	2.20907e+07	2.32979e+07	0		56.3717	3177.77	0	0	0	4547.26	4430.12	#DIV/0!	#DIV/0!														0	0	1	1
3187.77	12927.6	13668.7	0		3187.77	2.20907e+07	2.32979e+07	0		56.4604	3187.77	0	0	0	4681.77	4557.38	#DIV/0!	#DIV/0!														0	0	1	1
3187.87	12927.6	13668.7	0		3187.87	2.20907e+07	2.32979e+07	0		56.4612	3187.87	0	0	0	4570.11	4444.93	#DIV/0!	#DIV/0!														0	0	0	0
3187.96	12927.6	13668.7	0		3187.96	2.20907e+07	2.32979e+07	0		56.462	3187.96	0	0	0	4504.75	4379.6	#DIV/0!	#DIV/0!														0	0	0	0
3188.15	12927.6	13668.7	0		3188.15	2.20907e+07	2.32979e+07	0		56.4637	3188.15	0	0	0	4439.9	4312.83	#DIV/0!	#DIV/0!														0	0	0	0
3188.52	12927.6	13668.7	0		3188.52	2.20907e+07	2.32979e+07	0		56.467	3188.52	0	0	0	4381.46	4255.18	#DIV/0!	#DIV/0!														0	0	0	0
3189.27	12927.6	13668.7	0		3189.27	2.20907e+07	2.32979e+07	0		56.4736	3189.27	0	0	0	4332.22	4212.62	#DIV/0!	#DIV/0!														0	0	0	0
3190.77	12927.6	13668.7	0		3190.77	2.20907e+07	2.32979e+07	0		56.4869	3190.77	0	0	0	4316.04	4191.74	#DIV/0!	#DIV/0!														0	0	0	0
3193.77	12927.6	13668.7	0		3193.77	2.20907e+07	2.32979e+07	0		56.5135	3193.77	0	0	0	4273.55	4148.51	#DIV/0!	#DIV/0!														0	0	0	0
3196.77	12927.6	13668.7	0		3196.77	2.20907e+07	2.32979e+07	0		56.54	3196.77	0	0	0	4273.74	4148.47	#DIV/0!	#DIV/0!														0	0	0	0
3199.77	12927.6	13668.7	0		3199.77	2.20907e+07	2.32979e+07	0		56.5665	3199.77	0	0	0	4274.58	4149.92	#DIV/0!	#DIV/0!														0	0	0	0
3201.77	12927.6	13668.7	0		3201.77	2.20907e+07	2.32979e+07	0		56.5842	3201.77	0	0	0	4275.17	4150.51	#DIV/0!	#DIV/0!														0	0	0	0
3203.02	12927.8	13668.9	0.0542183		3203.02	2.2154e+07	2.33618e+07	0.0517012		56.5952	3203.02	0.267825	0.328536	0.184791	3000	3000	13815	11262.1														101189	102233	-1	-1
3204.27	12928.1	13669.3	0.0542245		3204.27	2.22463e+07	2.34588e+07	0.0516866		56.6063	3204.27	0.29731	0.411862	0.278131	3000	3000	12444.9	8983.6														46504	52933.3	-1	-1
3206.77	12929.8	13671.8	0.0542705		3206.77	2.23588e+07	2.35858e+07	0.0520251		56.6284	3206.77	1.05939	1.55441	0.318464	3000	3000	3492.59	2380.32														43499	48710.8	-1	-1
3211.77	12943.3	13687.9	0.0543978		3211.77	2.25635e+07	2.38126e+07	0.0524548		56.6725	3211.77	4.35731	4.91024	0.112608	3000	3000	849.148	753.527														38391.6	41991.7	-1	-1
3221.77	12993.7	13741.9	0.0544436		3221.77	2.29287e+07	2.42074e+07	0.0528226		56.7607	3221.77	5.71406	5.87364	0.0271684	3000	3000	647.526	629.934														34656.6	36979.2	-1	-1
3241.77	13104.3	13852.7	0.0540262		3241.77	2.35825e+07	2.48925e+07	0.0526254		56.9366	3241.77	5.34909	5.21506	0.0257017	3000	3000	691.706	709.484														30718	31523.1	-1	-1
3281.77	13295.2	14035.2	0.0527214		3281.77	2.46993e+07	2.6013e+07	0.0504986		57.2867	3281.77	4.19499	3.90612	0.0739537	3000	3000	882.003	947.231														25124.2	24501.2	-1	-1
3321.77	13445.4	14173.6	0.0513769		3321.77	2.56152e+07	2.68922e+07	0.0474834		57.6348	3321.77	3.31509	3.01608	0.0991384	3000	3000	1116.11	1226.76														20670.7	19459.5	-1	-1
3361.77	13565.4	14282.2	0.0501877		3361.77	2.63704e+07	2.75952e+07	0.0443848		57.9808	3361.77	2.68258	2.4112	0.11255	3000	3000	1379.27	1534.51														17087.8	15692.7	-1	-1
3381.77	13616.4	14327.9	0		3381.77	2.66961e+07	2.78928e+07	0.0429042		58.153	3381.77	2.42149	2.16673	0.117577	3000	3000	1527.99	1707.64														15483.6	14069.9	-1	-1
3381.77	13616.4	14327.9	0		3381.77	2.66961e+07	2.78928e+07	0		58.153	3381.77	0	0	0	2998.76	2991.56	#DIV/0!	#DIV/0!														0	0	0	0
3381.78	13616.4	14327.9	0		3381.78	2.66961e+07	2.78928e+07	0		58.153	3381.78	0	0	0	3029.89	3023.07	#DIV/0!	#DIV/0!														0	0	0	0
3381.78	13616.4	14327.9	0		3381.78	2.66961e+07	2.78928e+07	0		58.1531	3381.78	0	0	0	3123.28	3109.86	#DIV/0!	#DIV/0!														0	0	1	1
3381.78	13616.4	14327.9	0		3381.78	2.66961e+07	2.78928e+07	0		58.1531	3381.78	0	0	0	3129.78	3118.74	#DIV/0!	#DIV/0!														0	0	1	1
3381.79	13616.4	14327.9	0		3381.79	2.66961e+07	2.78928e+07	0		58.1531	3381.79	0	0	0	3137.22	3127.86	#DIV/0!	#DIV/0!														0	0	1	1
3381.8	13616.4	14327.9	0		3381.8	2.66961e+07	2.78928e+07	0		58.1532	3381.8	0	0	0	3155.78	3146.95	#DIV/0!	#DIV/0!														0	0	1	1
3381.82	13616.4	14327.9	0		3381.82	2.66961e+07	2.78928e+07	0		58.1534	3381.82	0	0	0	3198.02	3188.51	#DIV/0!	#DIV/0!														0	0	1	1
3381.85	13616.4	14327.9	0		3381.85	2.66961e+07	2.78928e+07	0		58.1537	3381.85	0	0	0	3283.7	3271.98	#DIV/0!	#DIV/0!														0	0	1	1
3381.93	13616.4	14327.9	0		3381.93	2.66961e+07	2.78928e+07	0		58.1544	3381.93	0	0	0	3447.3	3429.71	#DIV/0!	#DIV/0!														0	0	1	1
3382.09	13616.4	14327.9	0		3382.09	2.66961e+07	2.78928e+07	0		58.1557	3382.09	0	0	0	3714.74	3680.15	#DIV/0!	#DIV/0!														0	0	1	1
3382.4	13616.4	14327.9	0		3382.4	2.66961e+07	2.78928e+07	0		58.1584	3382.4	0	0	0	4008.93	3949.32	#DIV/0!	#DIV/0!														0	0	1	1
3383.03	13616.4	14327.9	0		3383.03	2.66961e+07	2.78928e+07	0		58.1638	3383.03	0	0	0	4147.53	4073.24	#DIV/0!	#DIV/0!														0	0	1	1
3384.28	13616.4	14327.9	0		3384.28	2.66961e+07	2.78928e+07	0		58.1745	3384.28	0	0	0	4108.65	4034.52	#DIV/0!	#DIV/0!														0	0	1	1
3386.78	13616.4	14327.9	0		3386.78	2.66961e+07	2.78928e+07	0		58.196	3386.78	0	0	0	4035.5	3964.22	#DIV/0!	#DIV/0!														0	0	1	1
3391.78	13616.4	14327.9	0		3391.78	2.66961e+07	2.78928e+07	0		58.239	3391.78	0	0	0	4013.32	3942.6	#DIV/0!	#DIV/0!														0	0	1	1
3401.78	13616.4	14327.9	0		3401.78	2.66961e+07	2.78928e+07	0		58.3247	3401.78	0	0	0	4075.19	4005.17	#DIV/0!	#DIV/0!														0	0	1	1
3411.78	13616.4	14327.9	0		3411.78	2.66961e+07	2.78928e+07	0		58.4104	3411.78	0	0	0	4175.2	4099.57	#DIV/0!	#DIV/0!														0	0	1	1
3421.78	13616.4	14327.9	0		3421.78	2.66961e+07	2.78928e+07	0		58.496	3421.78	0	0	0	4285.3	4205.36	#DIV/0!	#DIV/0!														0	0	1	1
3431.78	13616.4	14327.9	0		3431.78	2.66961e+07	2.78928e+07	0		58.5814	3431.78	0	0	0	4401.2	4317.14	#DIV/0!	#DIV/0!														0	0	1	1
3441.78	13616.4	14327.9	0		3441.78	2.66961e+07	2.78928e+07	0		58.6667	3441.78	0	0	0	4520.61	4432.54	#DIV/0!	#DIV/0!														0	0	1	1
3441.87	13616.4	14327.9	0		3441.87	2.66961e+07	2.78928e+07	0		58.6675	3441.87	0	0	0	4410.08	4321.13	#DIV/0!	#DIV/0!														0	0	0	0
3441.96	13616.4	14327.9	0		3441.96	2.66961e+07	2.78928e+07	0		58.6683	3441.96	0	0	0	4345.33	4256.36	#DIV/0!	#DIV/0!														0	0	0	0
3442.15	13616.4	14327.9	0		3442.15	2.66961e+07	2.78928e+07	0		58.6699	3442.15	0	0	0	4279.17	4190.06	#DIV/0!	#DIV/0!														0	0	0	0
3442.53	13616.4	14327.9	0		3442.53	2.66961e+07	2.78928e+07	0		58.673	3442.53	0	0	0	4222	4132.54	#DIV/0!	#DIV/0!														0	0	0	0
3443.28	13616.4	14327.9	0		3443.28	2.66961e+07	2.78928e+07	0		58.6794	3443.28	0	0	0	4180.63	4091.12	#DIV/0!	#DIV/0!														0	0	0	0
3444.78	13616.4	14327.9	0		3444.78	2.66961e+07	2.78928e+07	0		58.6922	3444.78	0	0	0	4159.58	4072.28	#DIV/0!	#DIV/0!														0	0	0	0
3447.78	13616.4	14327.9	0		3447.78	2.66961e+07	2.78928e+07	0		58.7178	3447.78	0	0	0	4117.01	4064.28	#DIV/0!	#DIV/0!														0	0	0	0
3450.78	13616.4	14327.9	0		3450.78	2.66961e+07	2.78928e+07	0		58.7433	3450.78	0	0	0	4117.31	4028.16	#DIV/0!	#DIV/0!														0	0	0	0
3453.78	13616.4	14327.9	0		3453.78	2.66961e+07	2.78928e+07	0		58.7688	3453.78	0	0	0	4118.37	4029.77	#DIV/0!	#DIV/0!														0	0	0	0
3455.78	13616.4	14327.9	0		3455.78	2.66961e+07	2.78928e+07	0		58.7859	3455.78	0	0	0	4119.32	4031	#DIV/0!	#DIV/0!														0	0	0	0
3457.03	13616.6	14328.1	0		3457.03	2.67567e+07	2.79544e+07	0.0428432		58.7965	3457.03	0.241574	0.290121	0.167333	3000	3000	15316.2	12753.3														96919	98419	-1	-1
3458.28	13616.9	14328.5	0.0496655		3458.28	2.68476e+07	2.80497e+07	0.0428555		58.8071	3458.28	0.26366	0.337974	0.219882	3000	3000	14033.2	10947.6														48483.7	54070	-1	-1
3460.78	13618.2	14330.2	0.0496895		3460.78	2.69655e+07	2.81803e+07	0.0431086		58.8284	3460.78	0.755913	1.0241	0.261876	3000	3000	4894.75	3612.93														45853.4	50451.9	-1	-1
3465.78	13628.1	14343.3	0.0498657		3465.78	2.71831e+07	2.84145e+07	0.0433365		58.8708	3465.78	3.2119	4.21478	0.237944	3000	3000	1151.97	877.863														41186.5	43215.8	-1	-1
3475.78	13667.3	14388.7	0.0501381		3475.78	2.7572e+07	2.88216e+07	0.0433569		58.9557	3475.78	4.62327	4.85679	0.0480809	3000	3000	800.299	761.82														36590.5	38207.7	-1	-1
3495.78	13757.4	14480.5	0.0499372		3495.78	2.82556e+07	2.95254e+07	0.0430062		59.1251	3495.78	4.38712	4.3228	0.0148775	3000	3000	843.378	855.926														31769.6	32168.2	-1	-1
3535.78	13914.1	14632.1	0.0490704		3535.78	2.93961e+07	3.06591e+07	0.0411947		59.4624	3535.78	3.4521	3.26098	0.0586091	3000	3000	1071.81	1134.63														25256.1	24518.4	-1	-1
3575.78	14037.9	14748.1	0.0481501		3575.78	3.0308e+07	3.15331e+07	0.0388516		59.7978	3575.78	2.73749	2.53437	0.0801478	3000	3000	1351.6	1459.93														20338.9	19182.6	-1	-1
3615.78	14137.1	14839.4	0.0473287		3615.78	3.10455e+07	3.22224e+07	0.0365246		60.1313	3615.78	2.22103	2.03475	0.0915448	3000	3000	1665.9	1818.4														16535.2	15281.2	-1	-1
3635.78	14179.4	14878.1	0		3635.78	3.13595e+07	3.25114e+07	0.035431		60.2974	3635.78	2.00709	1.83141	0.0959298	3000	3000	1843.46	2020.31														14863.8	13617.9	-1	-1
3635.78	14179.4	14878.1	0		3635.78	3.13595e+07	3.25114e+07	0		60.2974	3635.78	0	0	0	2993.79	3002.89	#DIV/0!	#DIV/0!														0	0	0	0
3635.78	14179.4	14878.1	0		3635.78	3.13595e+07	3.25114e+07	0		60.2974	3635.78	0	0	0	3026.27	3020.33	#DIV/0!	#DIV/0!														0	0	0	0
3635.78	14179.4	14878.1	0		3635.78	3.13595e+07	3.25114e+07	0		60.2975	3635.78	0	0	0	3113.25	3103.13	#DIV/0!	#DIV/0!														0	0	1	1
3635.79	14179.4	14878.1	0		3635.79	3.13595e+07	3.25114e+07	0		60.2975	3635.79	0	0	0	3119.8	3111.8	#DIV/0!	#DIV/0!														0	0	1	1
3635.79	14179.4	14878.1	0		3635.79	3.13595e+07	3.25114e+07	0		60.2975	3635.79	0	0	0	3127.02	3120.52	#DIV/0!	#DIV/0!														0	0	1	1
3635.8	14179.4	14878.1	0		3635.8	3.13595e+07	3.25114e+07	0		60.2976	3635.8	0	0	0	3144.58	3138.6	#DIV/0!	#DIV/0!														0	0	1	1
3635.82	14179.4	14878.1	0		3635.82	3.13595e+07	3.25114e+07	0		60.2978	3635.82	0	0	0	3184.2	3177.62	#DIV/0!	#DIV/0!														0	0	1	1
3635.86	14179.4	14878.1	0		3635.86	3.13595e+07	3.25114e+07	0		60.2981	3635.86	0	0	0	3263.95	3255.87	#DIV/0!	#DIV/0!														0	0	1	1
3635.94	14179.4	14878.1	0		3635.94	3.13595e+07	3.25114e+07	0		60.2987	3635.94	0	0	0	3415.04	3401.94	#DIV/0!	#DIV/0!														0	0	1	1
3636.09	14179.4	14878.1	0		3636.09	3.13595e+07	3.25114e+07	0		60.3	3636.09	0	0	0	3655.5	3630.43	#DIV/0!	#DIV/0!														0	0	1	1
3636.41	14179.4	14878.1	0		3636.41	3.13595e+07	3.25114e+07	0		60.3026	3636.41	0	0	0	3918.41	3876.08	#DIV/0!	#DIV/0!														0	0	1	1
3637.03	14179.4	14878.1	0		3637.03	3.13595e+07	3.25114e+07	0		60.3078	3637.03	0	0	0	4048.67	3995.36	#DIV/0!	#DIV/0!														0	0	1	1
3638.28	14179.4	14878.1	0		3638.28	3.13595e+07	3.25114e+07	0		60.3182	3638.28	0	0	0	4021.25	3967.14	#DIV/0!	#DIV/0!														0	0	1	1
3640.78	14179.4	14878.1	0		3640.78	3.13595e+07	3.25114e+07	0		60.3389	3640.78	0	0	0	3958.26	3905.72	#DIV/0!	#DIV/0!														0	0	1	1
3645.78	14179.4	14878.1	0		3645.78	3.13595e+07	3.25114e+07	0		60.3803	3645.78	0	0	0	3938.94	3886.57	#DIV/0!	#DIV/0!														0	0	1	1
3655.78	14179.4	14878.1	0		3655.78	3.13595e+07	3.25114e+07	0		60.4631	3655.78	0	0	0	3996.1	3942.09	#DIV/0!	#DIV/0!														0	0	1	1
3665.78	14179.4	14878.1	0		3665.78	3.13595e+07	3.25114e+07	0		60.5457	3665.78	0	0	0	4088.36	4032.01	#DIV/0!	#DIV/0!														0	0	1	1
3675.78	14179.4	14878.1	0		3675.78	3.13595e+07	3.25114e+07	0		60.6282	3675.78	0	0	0	4190.39	4131.22	#DIV/0!	#DIV/0!														0	0	1	1
3685.78	14179.4	14878.1	0		3685.78	3.13595e+07	3.25114e+07	0		60.7106	3685.78	0	0	0	4297.25	4235.23	#DIV/0!	#DIV/0!														0	0	1	1
3695.78	14179.4	14878.1	0		3695.78	3.13595e+07	3.25114e+07	0		60.7929	3695.78	0	0	0	4407.47	4342.61	#DIV/0!	#DIV/0!														0	0	1	1
3695.87	14179.4	14878.1	0		3695.87	3.13595e+07	3.25114e+07	0		60.7937	3695.87	0	0	0	4297.84	4232.17	#DIV/0!	#DIV/0!														0	0	0	0
3695.97	14179.4	14878.1	0		3695.97	3.13595e+07	3.25114e+07	0		60.7945	3695.97	0	0	0	4233.62	4168.06	#DIV/0!	#DIV/0!														0	0	0	0
3696.16	14179.4	14878.1	0		3696.16	3.13595e+07	3.25114e+07	0		60.796	3696.16	0	0	0	4167.67	4102.11	#DIV/0!	#DIV/0!														0	0	0	0
3696.53	14179.4	14878.1	0		3696.53	3.13595e+07	3.25114e+07	0		60.7991	3696.53	0	0	0	4110.29	4045.55	#DIV/0!	#DIV/0!														0	0	0	0
3697.28	14179.4	14878.1	0		3697.28	3.13595e+07	3.25114e+07	0		60.8053	3697.28	0	0	0	4069.3	4003.98	#DIV/0!	#DIV/0!														0	0	0	0
3698.78	14179.4	14878.1	0		3698.78	3.13595e+07	3.25114e+07	0		60.8176	3698.78	0	0	0	4049.28	3984.66	#DIV/0!	#DIV/0!														0	0	0	0
3701.78	14179.4	14878.1	0		3701.78	3.13595e+07	3.25114e+07	0		60.8423	3701.78	0	0	0	4006.11	3978.08	#DIV/0!	#DIV/0!														0	0	0	0
3704.78	14179.4	14878.1	0		3704.78	3.13595e+07	3.25114e+07	0		60.8669	3704.78	0	0	0	4007.28	3941.64	#DIV/0!	#DIV/0!														0	0	0	0
3707.78	14179.4	14878.1	0		3707.78	3.13595e+07	3.25114e+07	0		60.8916	3707.78	0	0	0	4007.98	3943.27	#DIV/0!	#DIV/0!														0	0	0	0
3709.78	14179.4	14878.1	0.0469625		3709.78	3.13595e+07	3.25114e+07	0		60.908	3709.78	0	0	0	4008.79	3944.54	#DIV/0!	#DIV/0!														0	0	0	0
3711.03	14179.5	14878.3	0.0469635		3711.03	3.14179e+07	3.25711e+07	0.0354043		60.9182	3711.03	0.217554	0.253396	0.141446	3000	3000	17007.2	14601.6														93446.5	95444.2	-1	-1
3712.28	14179.8	14878.6	0.0469661		3712.28	3.15071e+07	3.26647e+07	0.0354394		60.9285	3712.28	0.230059	0.282186	0.184727	3000	3000	16082.8	13111.9														49293.4	54434.9	-1	-1
3714.78	14180.8	14879.9	0.0469799		3714.78	3.16273e+07	3.27967e+07	0.0356565		60.949	3714.78	0.579562	0.73919	0.21595	3000	3000	6384.13	5005.48														46865.5	51162.1	-1	-1
3719.78	14188.3	14888.6	0.0470345		3719.78	3.1851e+07	3.30382e+07	0.035932		60.99	3719.78	2.40829	2.73765	0.120305	3000	3000	1536.36	1351.53														42619.9	45408.1	-1	-1
3729.78	14219.5	14922.1	0.0470902		3729.78	3.22515e+07	3.34605e+07	0.0361313		61.0719	3729.78	3.82703	3.97981	0.0383888	3000	3000	966.807	929.693														37483	39063.7	-1	-1
3749.78	14294.8	14998.8	0.0469353		3749.78	3.29472e+07	3.41756e+07	0.0359444		61.2355	3749.78	3.7112	3.68701	0.00656132	3000	3000	996.982	1003.52														32082.4	32446.5	-1	-1
3789.78	14427.8	15128.8	0.0463378		3789.78	3.40897e+07	3.53125e+07	0.034627		61.5612	3789.78	2.93612	2.81348	0.0435906	3000	3000	1260.17	1315.1														25044.1	24397.2	-1	-1
3829.78	14533.2	15229	0.0456894		3829.78	3.49882e+07	3.61779e+07	0.0328866		61.8852	3829.78	2.33437	2.19539	0.0633036	3000	3000	1585.01	1685.35														19877	18874.1	-1	-1
3869.78	14617.9	15308.3	0.0451002		3869.78	3.57051e+07	3.68532e+07	0.0311556		62.2076	3869.78	1.8983	1.76738	0.0740764	3000	3000	1949.11	2093.5														15968.2	14891.9	-1	-1
3889.78	14654	15341.9	0.0448343		3889.78	3.60074e+07	3.71342e+07	0.030344		62.3681	3889.78	1.71732	1.59172	0.0789072	3000	3000	2154.52	2324.53														14269.9	13207.6	-1	-1
	0.0448343					0.030344

## Sheet: Fig4Fig5Fig9
Fig1								Fig1
Time	Explicit	EDFM	EDFM Refined	tEDFM	perccentage			Time	Explicit	EDFM	EDFM Refined	EDFM modified
1e-06	2.4873e+08	2.24395e+08	2.49117e+08	2.49317e+08	0.0999586			1e-06	7.04324e+06	6.35417e+06	7.05421e+06	7.05986e+06
3.5e-06	2.41448e+08	1.96155e+08	2.4208e+08	2.42864e+08	0.192323			3.5e-06	6.83703e+06	5.5545e+06	6.85494e+06	6.87713e+06
1.1e-05	2.33001e+08	1.69748e+08	2.33888e+08	2.35058e+08	0.277844			1.1e-05	6.59784e+06	4.80674e+06	6.62297e+06	6.65609e+06
3.35e-05	2.23227e+08	1.48671e+08	2.24351e+08	2.25779e+08	0.341521			3.35e-05	6.32109e+06	4.20988e+06	6.3529e+06	6.39334e+06
0.000101	2.12283e+08	1.37476e+08	2.13573e+08	2.15185e+08	0.361129			0.000101	6.01118e+06	3.89288e+06	6.04771e+06	6.09336e+06
0.00025	2.02063e+08	1.34387e+08	2.03537e+08	2.05433e+08	0.345836			0.00025	5.72178e+06	3.80542e+06	5.76353e+06	5.81723e+06
0.000542	1.92691e+08	1.33812e+08	1.94219e+08	1.9638e+08	0.318609			0.000542	5.45641e+06	3.78912e+06	5.49968e+06	5.56086e+06
0.001109	1.83389e+08	1.33592e+08	1.85066e+08	1.87422e+08	0.287211			0.001109	5.19301e+06	3.78291e+06	5.24049e+06	5.30719e+06
0.002209	1.7398e+08	1.33255e+08	1.75806e+08	1.78286e+08	0.252581			0.002209	4.92658e+06	3.77336e+06	4.97827e+06	5.04851e+06
0.004339	1.64543e+08	1.32617e+08	1.66348e+08	1.68872e+08	0.214691			0.004339	4.65934e+06	3.75528e+06	4.71045e+06	4.78192e+06
0.008339	1.54989e+08	1.31454e+08	1.56852e+08	1.59317e+08	0.174892			0.008339	4.38879e+06	3.72237e+06	4.44154e+06	4.51137e+06
0.017679	1.43745e+08	1.28915e+08	1.45781e+08	1.47829e+08	0.127947			0.017679	4.07042e+06	3.65045e+06	4.12805e+06	4.18604e+06
0.040079	1.31215e+08	1.2364e+08	1.33249e+08	1.34392e+08	0.0800033			0.040079	3.7156e+06	3.50109e+06	3.77318e+06	3.80555e+06
0.071679	1.21355e+08	1.17461e+08	1.2345e+08	1.23703e+08	0.0504575			0.071679	3.43638e+06	3.32612e+06	3.4957e+06	3.50286e+06
0.119979	1.12159e+08	1.10045e+08	1.14449e+08	1.13519e+08	0.0306105			0.119979	3.176e+06	3.11611e+06	3.24084e+06	3.21451e+06
0.199879	1.02849e+08	1.01161e+08	1.05272e+08	1.02968e+08	0.0175471			0.199879	2.91236e+06	2.86457e+06	2.98097e+06	2.91574e+06
0.342879	9.2901e+07	9.08394e+07	9.52885e+07	9.1724e+07	0.00964403			0.342879	2.63066e+06	2.57229e+06	2.69827e+06	2.59734e+06
0.612879	8.19117e+07	7.96248e+07	8.42839e+07	8.00506e+07	0.00531965			0.612879	2.31948e+06	2.25472e+06	2.38665e+06	2.26678e+06
0.999879	7.22374e+07	7.03138e+07	7.46898e+07	7.05476e+07	0.00331321			0.999879	2.04553e+06	1.99107e+06	2.11498e+06	1.99769e+06
1.45388	6.47972e+07	6.34096e+07	6.72739e+07	6.3555e+07	0.00228805			1.45388	1.83485e+06	1.79556e+06	1.90499e+06	1.79968e+06
2.41788	5.57879e+07	5.50799e+07	5.80643e+07	5.51536e+07	0.00133628			2.41788	1.57974e+06	1.55969e+06	1.6442e+06	1.56178e+06
4.08788	4.73212e+07	4.71673e+07	4.92678e+07	4.7201e+07	0.000713605			4.08788	1.33999e+06	1.33563e+06	1.39511e+06	1.33658e+06
7.33788	3.89945e+07	3.9373e+07	4.07026e+07	3.93863e+07	0.000338292			7.33788	1.1042e+06	1.11492e+06	1.15257e+06	1.1153e+06
9.99788	3.46852e+07	3.53205e+07	3.63062e+07	3.53289e+07	0.000236751			9.99788	982177	1.00017e+06	1.02808e+06	1.0004e+06
15.1179	2.99827e+07	3.07879e+07	3.14637e+07	3.07931e+07	0.000170803			15.1179	849016	871816	890953	871964
19.9979	2.7121e+07	2.79428e+07	2.84594e+07	2.79473e+07	0.000161556			19.9979	767982	791252	805879	791380
30.9979	2.36029e+07	2.43365e+07	2.46978e+07	2.43405e+07	0.000164877			30.9979	668358	689133	699363	689247
40.9979	2.15307e+07	2.22038e+07	2.24911e+07	2.22078e+07	0.000178934			40.9979	609681	628742	636876	628855

## Sheet: Fig6Fig7
Time	Explicit	tEDFM X64	tEDFM X32	tEDFM X128	tEDFM X96	tEDFM X256			Time	Explicit	EDFM X64	EDFM X32	EDFM X128	EDFM X96	EDFM X256
1e-06	2.4873e+08	2.49317e+08	2.12237e+08	2.69856e+08	2.60935e+08	2.8201e+08			1e-06	2.4873e+08	2.24395e+08	2.03257e+08	2.31365e+08	2.28774e+08	2.34514e+08
3.5e-06	2.41448e+08	2.42864e+08	2.10167e+08	2.58573e+08	2.52059e+08	2.66296e+08			3.5e-06	2.41448e+08	1.96155e+08	1.90291e+08	1.96332e+08	1.9636e+08	1.98508e+08
1.1e-05	2.33001e+08	2.35058e+08	2.07526e+08	2.45799e+08	2.41662e+08	2.49688e+08			1.1e-05	2.33001e+08	1.69748e+08	1.7084e+08	1.73239e+08	1.71419e+08	1.81109e+08
3.35e-05	2.23227e+08	2.25779e+08	2.0415e+08	2.31813e+08	2.29802e+08	2.32814e+08			3.35e-05	2.23227e+08	1.48671e+08	1.45012e+08	1.59932e+08	1.54881e+08	1.74209e+08
0.000101	2.12283e+08	2.15185e+08	1.99884e+08	2.1737e+08	2.16955e+08	2.16642e+08			0.000101	2.12283e+08	1.37476e+08	1.23463e+08	1.55105e+08	1.47807e+08	1.72449e+08
0.00025	2.02063e+08	2.05433e+08	1.95445e+08	2.05347e+08	2.05766e+08	2.03916e+08			0.00025	2.02063e+08	1.34387e+08	1.14263e+08	1.54178e+08	1.46295e+08	1.71713e+08
0.000542	1.92691e+08	1.9638e+08	1.90734e+08	1.95092e+08	1.95886e+08	1.93382e+08			0.000542	1.92691e+08	1.33812e+08	1.11786e+08	1.53791e+08	1.45948e+08	1.70564e+08
0.001109	1.83389e+08	1.87422e+08	1.85373e+08	1.85565e+08	1.86496e+08	1.83657e+08			0.001109	1.83389e+08	1.33592e+08	1.11327e+08	1.53173e+08	1.45572e+08	1.6849e+08
0.002209	1.7398e+08	1.78286e+08	1.79083e+08	1.76217e+08	1.77184e+08	1.73997e+08			0.002209	1.7398e+08	1.33255e+08	1.11191e+08	1.52018e+08	1.44876e+08	1.64927e+08
0.004339	1.64543e+08	1.68872e+08	1.71694e+08	1.66708e+08	1.67715e+08	1.6398e+08			0.004339	1.64543e+08	1.32617e+08	1.11004e+08	1.49918e+08	1.43577e+08	1.59314e+08
0.008339	1.54989e+08	1.59317e+08	1.63333e+08	1.5697e+08	1.58098e+08	1.53671e+08			0.008339	1.54989e+08	1.31454e+08	1.10658e+08	1.46383e+08	1.41291e+08	1.51632e+08
0.017679	1.43745e+08	1.47829e+08	1.52383e+08	1.45051e+08	1.46413e+08	1.41636e+08			0.017679	1.43745e+08	1.28915e+08	1.09865e+08	1.39739e+08	1.36636e+08	1.40928e+08
0.040079	1.31215e+08	1.34392e+08	1.38992e+08	1.31059e+08	1.32589e+08	1.28737e+08			0.040079	1.31215e+08	1.2364e+08	1.08042e+08	1.29011e+08	1.28119e+08	1.28445e+08
0.071679	1.21355e+08	1.23703e+08	1.28393e+08	1.20165e+08	1.2158e+08	1.1922e+08			0.071679	1.21355e+08	1.17461e+08	1.0562e+08	1.19227e+08	1.19406e+08	1.19018e+08
0.119979	1.12159e+08	1.13519e+08	1.18358e+08	1.1045e+08	1.11412e+08	1.10739e+08			0.119979	1.12159e+08	1.10045e+08	1.02226e+08	1.09925e+08	1.10306e+08	1.10591e+08
0.199879	1.02849e+08	1.02968e+08	1.07832e+08	1.01053e+08	1.01359e+08	1.02156e+08			0.199879	1.02849e+08	1.01161e+08	9.73027e+07	1.00712e+08	1.00749e+08	1.02054e+08
0.342879	9.2901e+07	9.1724e+07	9.61191e+07	9.13562e+07	9.10535e+07	9.27985e+07			0.342879	9.2901e+07	9.08394e+07	9.01377e+07	9.11335e+07	9.06912e+07	9.27349e+07
0.612879	8.19117e+07	8.00506e+07	8.31011e+07	8.10299e+07	8.03842e+07	8.24513e+07			0.612879	8.19117e+07	7.96248e+07	8.0338e+07	8.0899e+07	8.01735e+07	8.24155e+07
0.999879	7.22374e+07	7.05476e+07	7.19539e+07	7.21519e+07	7.14347e+07	7.34113e+07			0.999879	7.22374e+07	7.03138e+07	7.07769e+07	7.20753e+07	7.13096e+07	7.33909e+07
1.45388	6.47972e+07	6.3555e+07	6.3615e+07	6.53102e+07	6.46257e+07	6.64096e+07			1.45388	6.47972e+07	6.34096e+07	6.31072e+07	6.52626e+07	6.4547e+07	6.63972e+07
2.41788	5.57879e+07	5.51536e+07	5.38691e+07	5.67841e+07	5.61937e+07	5.76758e+07			2.41788	5.57879e+07	5.50799e+07	5.3738e+07	5.67604e+07	5.61543e+07	5.76697e+07
4.08788	4.73212e+07	4.7201e+07	4.5253e+07	4.85685e+07	4.80844e+07	4.92681e+07			4.08788	4.73212e+07	4.71673e+07	4.52388e+07	4.85578e+07	4.80667e+07	4.92652e+07
7.33788	3.89945e+07	3.93863e+07	3.73573e+07	4.04531e+07	4.0075e+07	4.09781e+07			7.33788	3.89945e+07	3.9373e+07	3.73662e+07	4.04486e+07	4.00679e+07	4.09769e+07
9.99788	3.46852e+07	3.53289e+07	3.33943e+07	3.62387e+07	3.59144e+07	3.66796e+07			9.99788	3.46852e+07	3.53205e+07	3.34007e+07	3.62357e+07	3.59098e+07	3.66787e+07
15.1179	2.99827e+07	3.07931e+07	2.90456e+07	3.15335e+07	3.12673e+07	3.18878e+07			15.1179	2.99827e+07	3.07879e+07	2.90493e+07	3.15315e+07	3.12643e+07	3.18871e+07
19.9979	2.7121e+07	2.79473e+07	2.63384e+07	2.85854e+07	2.83545e+07	2.88888e+07			19.9979	2.7121e+07	2.79428e+07	2.63392e+07	2.85837e+07	2.83519e+07	2.88882e+07
30.9979	2.36029e+07	2.43405e+07	2.29332e+07	2.48549e+07	2.46673e+07	2.50981e+07			30.9979	2.36029e+07	2.43365e+07	2.29309e+07	2.48534e+07	2.4665e+07	2.50976e+07
40.9979	2.15307e+07	2.22078e+07	2.09325e+07	2.26518e+07	2.24891e+07	2.28611e+07			40.9979	2.15307e+07	2.22038e+07	2.09279e+07	2.26503e+07	2.24869e+07	2.28606e+07

## Sheet: Fig8
X64					x32 (1395)						x128 (20955)					x96 (12825)					x256 (57375)
Time	EDFM	EDFM modified			Time	EDFM	EDFM modified				Time	EDFM	EDFM modified			Time	EDFM	EDFM modified			Time	EDFM	EDFM modified	percentage		Time	X32	X64	X128	X96	X256
1e-06	6.35417e+06	7.05986e+06	0.0999586		1e-06	2.03257e+08	2.12237e+08	0.0423081			1e-06	2.31365e+08	2.69856e+08	0.142636		1e-06	2.28774e+08	2.60935e+08	0.123252		1e-06	2.34514e+08	2.8201e+08	0.168419		1e-06	0.0423081	0.0999586	0.142636	0.123252	0.168419
3.5e-06	5.5545e+06	6.87713e+06	0.192323		3.5e-06	1.90291e+08	2.10167e+08	0.0945729			3.5e-06	1.96332e+08	2.58573e+08	0.240711		3.5e-06	1.9636e+08	2.52059e+08	0.220975		3.5e-06	1.98508e+08	2.66296e+08	0.254558		3.5e-06	0.0945729	0.192323	0.240711	0.220975	0.254558
1.1e-05	4.80674e+06	6.65609e+06	0.277844		1.1e-05	1.7084e+08	2.07526e+08	0.176779			1.1e-05	1.73239e+08	2.45799e+08	0.295198		1.1e-05	1.71419e+08	2.41662e+08	0.290666		1.1e-05	1.81109e+08	2.49688e+08	0.274657		1.1e-05	0.176779	0.277844	0.295198	0.290666	0.274657
3.35e-05	4.20988e+06	6.39334e+06	0.341521		3.35e-05	1.45012e+08	2.0415e+08	0.289677			3.35e-05	1.59932e+08	2.31813e+08	0.310083		3.35e-05	1.54881e+08	2.29802e+08	0.326027		3.35e-05	1.74209e+08	2.32814e+08	0.251725		3.35e-05	0.289677	0.341521	0.310083	0.326027	0.251725
0.000101	3.89288e+06	6.09336e+06	0.361129		0.000101	1.23463e+08	1.99884e+08	0.382328			0.000101	1.55105e+08	2.1737e+08	0.286447		0.000101	1.47807e+08	2.16955e+08	0.31872		0.000101	1.72449e+08	2.16642e+08	0.203991		0.000101	0.382328	0.361129	0.286447	0.31872	0.203991
0.00025	3.80542e+06	5.81723e+06	0.345836		0.00025	1.14263e+08	1.95445e+08	0.41537			0.00025	1.54178e+08	2.05347e+08	0.249181		0.00025	1.46295e+08	2.05766e+08	0.289025		0.00025	1.71713e+08	2.03916e+08	0.157925		0.00025	0.41537	0.345836	0.249181	0.289025	0.157925
0.000542	3.78912e+06	5.56086e+06	0.318609		0.000542	1.11786e+08	1.90734e+08	0.413919			0.000542	1.53791e+08	1.95092e+08	0.211699		0.000542	1.45948e+08	1.95886e+08	0.254935		0.000542	1.70564e+08	1.93382e+08	0.117995		0.000542	0.413919	0.318609	0.211699	0.254935	0.117995
0.001109	3.78291e+06	5.30719e+06	0.287211		0.001109	1.11327e+08	1.85373e+08	0.399444			0.001109	1.53173e+08	1.85565e+08	0.174561		0.001109	1.45572e+08	1.86496e+08	0.219435		0.001109	1.6849e+08	1.83657e+08	0.0825827		0.001109	0.399444	0.287211	0.174561	0.219435	0.0825827
0.002209	3.77336e+06	5.04851e+06	0.252581		0.002209	1.11191e+08	1.79083e+08	0.379107			0.002209	1.52018e+08	1.76217e+08	0.137323		0.002209	1.44876e+08	1.77184e+08	0.18234		0.002209	1.64927e+08	1.73997e+08	0.0521255		0.002209	0.379107	0.252581	0.137323	0.18234	0.0521255
0.004339	3.75528e+06	4.78192e+06	0.214691		0.004339	1.11004e+08	1.71694e+08	0.353481			0.004339	1.49918e+08	1.66708e+08	0.100712		0.004339	1.43577e+08	1.67715e+08	0.143923		0.004339	1.59314e+08	1.6398e+08	0.0284564		0.004339	0.353481	0.214691	0.100712	0.143923	0.0284564
0.008339	3.72237e+06	4.51137e+06	0.174892		0.008339	1.10658e+08	1.63333e+08	0.322502			0.008339	1.46383e+08	1.5697e+08	0.0674476		0.008339	1.41291e+08	1.58098e+08	0.106308		0.008339	1.51632e+08	1.53671e+08	0.0132683		0.008339	0.322502	0.174892	0.0674476	0.106308	0.0132683
0.017679	3.65045e+06	4.18604e+06	0.127947		0.017679	1.09865e+08	1.52383e+08	0.279025			0.017679	1.39739e+08	1.45051e+08	0.0366217		0.017679	1.36636e+08	1.46413e+08	0.0667774		0.017679	1.40928e+08	1.41636e+08	0.00500138		0.017679	0.279025	0.127947	0.0366217	0.0667774	0.00500138
0.040079	3.50109e+06	3.80555e+06	0.0800033		0.040079	1.08042e+08	1.38992e+08	0.222674			0.040079	1.29011e+08	1.31059e+08	0.0156216		0.040079	1.28119e+08	1.32589e+08	0.0337096		0.040079	1.28445e+08	1.28737e+08	0.00227023		0.040079	0.222674	0.0800033	0.0156216	0.0337096	0.00227023
0.071679	3.32612e+06	3.50286e+06	0.0504575		0.071679	1.0562e+08	1.28393e+08	0.177364			0.071679	1.19227e+08	1.20165e+08	0.00781238		0.071679	1.19406e+08	1.2158e+08	0.0178786		0.071679	1.19018e+08	1.1922e+08	0.00169408		0.071679	0.177364	0.0504575	0.00781238	0.0178786	0.00169408
0.119979	3.11611e+06	3.21451e+06	0.0306105		0.119979	1.02226e+08	1.18358e+08	0.136298			0.119979	1.09925e+08	1.1045e+08	0.00475666		0.119979	1.10306e+08	1.11412e+08	0.00991915		0.119979	1.10591e+08	1.10739e+08	0.00133633		0.119979	0.136298	0.0306105	0.00475666	0.00991915	0.00133633
0.199879	2.86457e+06	2.91574e+06	0.0175471		0.199879	9.73027e+07	1.07832e+08	0.0976467			0.199879	1.00712e+08	1.01053e+08	0.00338062		0.199879	1.00749e+08	1.01359e+08	0.00601735		0.199879	1.02054e+08	1.02156e+08	0.000993944		0.199879	0.0976467	0.0175471	0.00338062	0.00601735	0.000993944
0.342879	2.57229e+06	2.59734e+06	0.00964403		0.342879	9.01377e+07	9.61191e+07	0.0622285			0.342879	9.11335e+07	9.13562e+07	0.0024382		0.342879	9.06912e+07	9.10535e+07	0.00397845		0.342879	9.27349e+07	9.27985e+07	0.000685339		0.342879	0.0622285	0.00964403	0.0024382	0.00397845	0.000685339
0.612879	2.25472e+06	2.26678e+06	0.00531965		0.612879	8.0338e+07	8.31011e+07	0.0332497			0.612879	8.0899e+07	8.10299e+07	0.0016157		0.612879	8.01735e+07	8.03842e+07	0.00262039		0.612879	8.24155e+07	8.24513e+07	0.000433429		0.612879	0.0332497	0.00531965	0.0016157	0.00262039	0.000433429
0.999879	1.99107e+06	1.99769e+06	0.00331321		0.999879	7.07769e+07	7.19539e+07	0.0163579			0.999879	7.20753e+07	7.21519e+07	0.00106122		0.999879	7.13096e+07	7.14347e+07	0.00175113		0.999879	7.33909e+07	7.34113e+07	0.000277154		0.999879	0.0163579	0.00331321	0.00106122	0.00175113	0.000277154
1.45388	1.79556e+06	1.79968e+06	0.00228805		1.45388	6.31072e+07	6.3615e+07	0.00798296			1.45388	6.52626e+07	6.53102e+07	0.000727825		1.45388	6.4547e+07	6.46257e+07	0.00121674		1.45388	6.63972e+07	6.64096e+07	0.000187591		1.45388	0.00798296	0.00228805	0.000727825	0.00121674	0.000187591
2.41788	1.55969e+06	1.56178e+06	0.00133628		2.41788	5.3738e+07	5.38691e+07	0.00243381			2.41788	5.67604e+07	5.67841e+07	0.000416816		2.41788	5.61543e+07	5.61937e+07	0.000701231		2.41788	5.76697e+07	5.76758e+07	0.0001068		2.41788	0.00243381	0.00133628	0.000416816	0.000701231	0.0001068
4.08788	1.33563e+06	1.33658e+06	0.000713605		4.08788	4.52388e+07	4.5253e+07	0.00031337			4.08788	4.85578e+07	4.85685e+07	0.00022143		4.08788	4.80667e+07	4.80844e+07	0.000369401		4.08788	4.92652e+07	4.92681e+07	5.77427e-05		4.08788	0.00031337	0.000713605	0.00022143	0.000369401	5.77427e-05
7.33788	1.11492e+06	1.1153e+06	0.000338292		7.33788	3.73662e+07	3.73573e+07	-0.000237262			7.33788	4.04486e+07	4.04531e+07	0.000110806		7.33788	4.00679e+07	4.0075e+07	0.000177311		7.33788	4.09769e+07	4.09781e+07	3.10398e-05		7.33788	-0.000237262	0.000338292	0.000110806	0.000177311	3.10398e-05
9.99788	1.00017e+06	1.0004e+06	0.000236751		9.99788	3.34007e+07	3.33943e+07	-0.000190156			9.99788	3.62357e+07	3.62387e+07	8.23045e-05		9.99788	3.59098e+07	3.59144e+07	0.000126613		9.99788	3.66787e+07	3.66796e+07	2.46819e-05		9.99788	-0.000190156	0.000236751	8.23045e-05	0.000126613	2.46819e-05
15.1179	871816	871964	0.000170803		15.1179	2.90493e+07	2.90456e+07	-0.000127135			15.1179	3.15315e+07	3.15335e+07	6.4677e-05		15.1179	3.12643e+07	3.12673e+07	9.51166e-05		15.1179	3.18871e+07	3.18878e+07	2.08453e-05		15.1179	-0.000127135	0.000170803	6.4677e-05	9.51166e-05	2.08453e-05
19.9979	791252	791380	0.000161556		19.9979	2.63392e+07	2.63384e+07	-2.93963e-05			19.9979	2.85837e+07	2.85854e+07	6.22802e-05		19.9979	2.83519e+07	2.83545e+07	9.08013e-05		19.9979	2.88882e+07	2.88888e+07	2.04991e-05		19.9979	-2.93963e-05	0.000161556	6.22802e-05	9.08013e-05	2.04991e-05
30.9979	689133	689247	0.000164877		30.9979	2.29309e+07	2.29332e+07	0.000102411			30.9979	2.48534e+07	2.48549e+07	6.23826e-05		30.9979	2.4665e+07	2.46673e+07	9.18274e-05		30.9979	2.50976e+07	2.50981e+07	2.05001e-05		30.9979	0.000102411	0.000164877	6.23826e-05	9.18274e-05	2.05001e-05
40.9979	628742	628855	0.000178934		40.9979	2.09279e+07	2.09325e+07	0.000220039			40.9979	2.26503e+07	2.26518e+07	6.52376e-05		40.9979	2.24869e+07	2.24891e+07	9.77125e-05		40.9979	2.28606e+07	2.28611e+07	2.10845e-05		40.9979	0.000220039	0.000178934	6.52376e-05	9.77125e-05	2.10845e-05
																										Time (s)
																									Grid resoulation	EDFM	Modified	Percentage
																									X32	13.7738	19.4535	0.412358
																									X64	59.0293	76.8336	0.301617
																									X128	193.197	227.795	0.179079
																									X256	566.583	689.418	0.216799

## Sheet: Fig9a
Fig1
Time	Explicit	EDFM	EDFM Refined	tEDFM	perccentage
1e-06	2.39454e+08	2.23946e+08	2.40622e+08	2.40787e+08	0.0699428
3.5e-06	2.26219e+08	1.94265e+08	2.27156e+08	2.28369e+08	0.149338
1.1e-05	2.13411e+08	1.63338e+08	2.14385e+08	2.16113e+08	0.244201
3.35e-05	2.00192e+08	1.31031e+08	2.01434e+08	2.03336e+08	0.355593
0.000101	1.86158e+08	9.89145e+07	1.87612e+08	1.89602e+08	0.478305
0.00025	1.73401e+08	7.4185e+07	1.75094e+08	1.77334e+08	0.581664
0.000542	1.62067e+08	5.93077e+07	1.63801e+08	1.66282e+08	0.64333
0.001109	1.51202e+08	5.29045e+07	1.53051e+08	1.55693e+08	0.660199
0.002209	1.40436e+08	5.11436e+07	1.42449e+08	1.45193e+08	0.647755
0.004339	1.29735e+08	5.08093e+07	1.31745e+08	1.34561e+08	0.622408
0.008339	1.18846e+08	5.06613e+07	1.20931e+08	1.23823e+08	0.590857
0.017679	1.05679e+08	5.037e+07	1.08024e+08	1.10842e+08	0.545571
0.040079	9.06644e+07	4.9691e+07	9.30566e+07	9.57347e+07	0.480951
0.071679	7.90058e+07	4.87671e+07	8.13776e+07	8.42307e+07	0.421029
0.119979	6.85451e+07	4.74284e+07	7.09679e+07	7.382e+07	0.357513
0.199879	5.86139e+07	4.53921e+07	6.09834e+07	6.35703e+07	0.285954
0.342879	4.90281e+07	4.2221e+07	5.10974e+07	5.30902e+07	0.204731
0.612879	3.97699e+07	3.74772e+07	4.14826e+07	4.25387e+07	0.118985
0.999879	3.25892e+07	3.24344e+07	3.41047e+07	3.42801e+07	0.0538415
1.45388	2.76051e+07	2.81137e+07	2.89854e+07	2.84812e+07	0.0129022
2.41788	2.22317e+07	2.2542e+07	2.33383e+07	2.21079e+07	0.0196359
4.08788	1.77157e+07	1.75261e+07	1.85136e+07	1.70074e+07	0.0305001
7.33788	1.36652e+07	1.33073e+07	1.42647e+07	1.29826e+07	0.0250095
9.99788	1.16734e+07	1.13914e+07	1.22131e+07	1.11856e+07	0.0184004
15.1179	9.59897e+06	9.50423e+06	1.00704e+07	9.39452e+06	0.011678
19.9979	8.38221e+06	8.39383e+06	8.78888e+06	8.32577e+06	0.00817535
30.9979	6.94634e+06	7.02943e+06	7.24226e+06	6.99171e+06	0.00539459
40.9979	6.12262e+06	6.22814e+06	6.35877e+06	6.203e+06	0.00405323

## Sheet: Fig9c
Fig1
Time	Explicit	EDFM	EDFM Refined	tEDFM	perccentage
1e-06	2.54204e+08	2.28236e+08	2.54388e+08	2.54442e+08	0.102993
3.5e-06	2.5107e+08	2.09514e+08	2.51418e+08	2.51758e+08	0.167797
1.1e-05	2.46738e+08	2.00667e+08	2.47288e+08	2.4789e+08	0.1905
3.35e-05	2.40788e+08	1.98431e+08	2.41565e+08	2.42437e+08	0.181515
0.000101	2.33105e+08	1.98052e+08	2.34095e+08	2.35227e+08	0.158037
0.00025	2.25356e+08	1.97714e+08	2.26527e+08	2.2795e+08	0.132642
0.000542	2.18001e+08	1.97082e+08	2.19237e+08	2.2086e+08	0.107659
0.001109	2.10588e+08	1.95906e+08	2.11972e+08	2.13621e+08	0.0829284
0.002209	2.03027e+08	1.9379e+08	2.04543e+08	2.05976e+08	0.0591632
0.004339	1.95299e+08	1.90208e+08	1.96834e+08	1.97713e+08	0.0379567
0.008339	1.87285e+08	1.84808e+08	1.8894e+08	1.88873e+08	0.0215238
0.017679	1.77718e+08	1.76296e+08	1.79566e+08	1.78014e+08	0.00965301
0.040079	1.67034e+08	1.65327e+08	1.68902e+08	1.65968e+08	0.00386596
0.071679	1.5872e+08	1.56892e+08	1.6066e+08	1.5725e+08	0.00227617
0.119979	1.51165e+08	1.49657e+08	1.53269e+08	1.4991e+08	0.00168731
0.199879	1.43757e+08	1.42727e+08	1.45954e+08	1.42918e+08	0.0013384
0.342879	1.36028e+08	1.35445e+08	1.3821e+08	1.35589e+08	0.00106055
0.612879	1.27511e+08	1.27464e+08	1.29777e+08	1.2757e+08	0.000831755
0.999879	1.19882e+08	1.20377e+08	1.22349e+08	1.20459e+08	0.000679134
1.45388	1.13853e+08	1.14735e+08	1.16467e+08	1.14802e+08	0.000580985
2.41788	1.06199e+08	1.07392e+08	1.08847e+08	1.07443e+08	0.000475106
4.08788	9.85038e+07	9.99111e+07	1.01115e+08	9.99499e+07	0.000388238
7.33788	9.02926e+07	9.20074e+07	9.29733e+07	9.20363e+07	0.000313779
9.99788	8.5749e+07	8.76615e+07	8.85053e+07	8.76859e+07	0.000278718
15.1179	8.03153e+07	8.24039e+07	8.31099e+07	8.24237e+07	0.000240199
19.9979	7.66457e+07	7.87737e+07	7.93906e+07	7.87907e+07	0.000215403
30.9979	7.10904e+07	7.30831e+07	7.35808e+07	7.30961e+07	0.000177525
40.9979	6.70741e+07	6.88926e+07	6.93163e+07	6.8903e+07	0.000150435

## Sheet: Fig9d
Fig1
Time	Explicit	EDFM	EDFM Refined	tEDFM	perccentage
1e-06	2.56505e+08	2.43398e+08	2.56577e+08	2.56589e+08	0.0514096
3.5e-06	2.55379e+08	2.40335e+08	2.55517e+08	2.55638e+08	0.0598647
1.1e-05	2.53667e+08	2.39957e+08	2.53904e+08	2.54138e+08	0.0558028
3.35e-05	2.51018e+08	2.39687e+08	2.51393e+08	2.51761e+08	0.0479584
0.000101	2.47072e+08	2.38946e+08	2.47631e+08	2.48115e+08	0.0369554
0.00025	2.42586e+08	2.37462e+08	2.43328e+08	2.43832e+08	0.0261227
0.000542	2.37968e+08	2.35024e+08	2.38835e+08	2.39097e+08	0.0170343
0.001109	2.3318e+08	2.31479e+08	2.34214e+08	2.3389e+08	0.0103065
0.002209	2.28392e+08	2.27031e+08	2.29576e+08	2.2844e+08	0.00616674
0.004339	2.23757e+08	2.22231e+08	2.25024e+08	2.23142e+08	0.00407993
0.008339	2.19249e+08	2.17645e+08	2.20657e+08	2.18327e+08	0.00312533
0.017679	2.14119e+08	2.12715e+08	2.15742e+08	2.13258e+08	0.00254252
0.040079	2.08605e+08	2.0751e+08	2.10386e+08	2.0795e+08	0.00211605
0.071679	2.04493e+08	2.03678e+08	2.06411e+08	2.0406e+08	0.0018735
0.119979	2.00911e+08	2.00382e+08	2.02995e+08	2.00724e+08	0.00170101
0.199879	1.97514e+08	1.97232e+08	1.99736e+08	1.97541e+08	0.00156022
0.342879	1.94076e+08	1.93994e+08	1.96393e+08	1.94273e+08	0.00143409
0.612879	1.9042e+08	1.90572e+08	1.92863e+08	1.90823e+08	0.00131664
0.999879	1.8723e+08	1.87626e+08	1.89828e+08	1.87857e+08	0.00122603
1.45388	1.8472e+08	1.85306e+08	1.87438e+08	1.85521e+08	0.00116036
2.41788	1.81333e+08	1.82089e+08	1.84127e+08	1.82285e+08	0.00107643
4.08788	1.77136e+08	1.7796e+08	1.79894e+08	1.78135e+08	0.000978318
7.33788	1.70382e+08	1.71185e+08	1.72972e+08	1.71329e+08	0.000836681
9.99788	1.65256e+08	1.66022e+08	1.67706e+08	1.66145e+08	0.000741193
15.1179	1.56195e+08	1.56885e+08	1.58396e+08	1.56979e+08	0.000595451
19.9979	1.48213e+08	1.48838e+08	1.50201e+08	1.4891e+08	0.000485037
30.9979	1.32681e+08	1.33183e+08	1.34277e+08	1.33225e+08	0.000310858
40.9979	1.20416e+08	1.20827e+08	1.21719e+08	1.20851e+08	0.00019728
